# Supplementary material for: Identifying intensive care unit discharge planning tools: protocol for a scoping review
Source: PubMed Central journal article supplement — BMJ Open. 2013 Apr 5;3(4):e002653. doi: 10.1136/bmjopen-2013-002653 (PMC3641498; doi:10.1136/bmjopen-2013-002653), 2013-04-05
Supplement: bmjopen-2013-002653.draft_revisions.pdf [file bmjopen-2013-002653.draft_revisions.pdf]

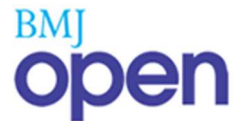

## Identifying Intensive Care Unit Discharge Planning Tools: Protocol for a Scoping Review

|                                 |                                                                                                                                                                                                                                                                                                                                                                                                                                                                                                                                                                     |
|---------------------------------|---------------------------------------------------------------------------------------------------------------------------------------------------------------------------------------------------------------------------------------------------------------------------------------------------------------------------------------------------------------------------------------------------------------------------------------------------------------------------------------------------------------------------------------------------------------------|
| Journal:                        | <i>BMJ Open</i>                                                                                                                                                                                                                                                                                                                                                                                                                                                                                                                                                     |
| Manuscript ID:                  | bmjopen-2013-002653                                                                                                                                                                                                                                                                                                                                                                                                                                                                                                                                                 |
| Article Type:                   | Protocol                                                                                                                                                                                                                                                                                                                                                                                                                                                                                                                                                            |
| Date Submitted by the Author:   | 30-Jan-2013                                                                                                                                                                                                                                                                                                                                                                                                                                                                                                                                                         |
| Complete List of Authors:       | Stelfox, Henry; University of Calgary, Critical Care Medicine<br>Perrier, Laure; The Keenan Research Centre in the Li Ka Shing Knowledge Institute of St. Michael's Hospital,<br>Straus, Sharon; The Keenan Research Centre in the Li Ka Shing Knowledge Institute of St. Michael's Hospital,<br>Ghali, William; University of Calgary, Community Health Sciences<br>Zygun, David; University of Alberta, Critical Care Medicine<br>Boiteau, Paul; Alberta Health Services, Critical Care Medicine<br>Zuege, Danny; Alberta Health Services, Critical Care Medicine |
| <b>Primary Subject Heading</b>: | Intensive care                                                                                                                                                                                                                                                                                                                                                                                                                                                                                                                                                      |
| Secondary Subject Heading:      | Health services research                                                                                                                                                                                                                                                                                                                                                                                                                                                                                                                                            |
| Keywords:                       | Protocols & guidelines < HEALTH SERVICES ADMINISTRATION & MANAGEMENT, Quality in health care < HEALTH SERVICES ADMINISTRATION & MANAGEMENT, INTENSIVE & CRITICAL CARE                                                                                                                                                                                                                                                                                                                                                                                               |
|                                 |                                                                                                                                                                                                                                                                                                                                                                                                                                                                                                                                                                     |

SCHOLARONE™  
Manuscripts

Only

## Identifying Intensive Care Unit Discharge Planning Tools: Protocol for a Scoping Review

Henry T Stelfox, MD, PhD, FRCPC<sup>1-4</sup> (tstelfox@ucalgary.ca)

Laure Perrier, MEd, MLIS<sup>5,6</sup> (l.perrier@utoronto.ca)

Sharon E Straus, MD, MSc, FRCPC<sup>7</sup> (sharon.straus@utoronto.ca)

William A Ghali, MD, MPH, FRCPC<sup>2-4</sup> (wghali@ucalgary.ca)

David Zygun, MD, MSc, FRCPC<sup>8,9</sup> (zygun@ualberta.ca)

Paul Boiteau, MD, FRCPC<sup>1</sup> (paul.boiteau@albertahealthservices.ca)

Danny J Zuege, MD, MSc, FRCPC<sup>1,2</sup> (dan.zuege@albertahealthservices.ca)

### Affiliations:

1. Department of Critical Care Medicine, University of Calgary and Alberta Health Services – Calgary Zone
2. Department of Medicine, University of Calgary and Alberta Health Services – Calgary Zone
3. Department of Community Health Sciences, University of Calgary
4. Institute for Public Health, University of Calgary
5. Li Ka Shing Knowledge Institute, Saint Michael's Hospital
6. Continuing Education & Professional Development, Faculty of Medicine, University of Toronto
7. Saint Michael's Hospital, Department of Medicine, University of Toronto
8. Division of Critical Care, University of Alberta
9. Department of Critical Care Medicine, Alberta Health Services – Edmonton Zone

Keywords: Scoping review, continuity of care, transitions of care, intensive care unit, discharge.

Word Count: 3,326

Correspondence: Henry Thomas Stelfox

Teaching Research & Wellness Building, University of Calgary

3280 Hospital Drive NW, Calgary, AB, Canada, T2N 4Z6

Tel: (403) 944-2334, Fax: (403) 283-9994

January 29, 2013

## ABSTRACT

**Background:** Transitions of care between providers are vulnerable periods in health care delivery that expose patients to preventable errors and adverse events. Patient discharge from the intensive care unit (ICU) to a medical or surgical hospital ward is one of the most challenging and high risk transitions of care. Approximately one in twelve patients discharged will be readmitted to ICU or die before leaving hospital. Many more patients are exposed to unnecessary health care, adverse events and/or are disappointed with the quality of their care. Our objective is to conduct a scoping review by systematically searching the literature to identify ICU discharge planning tools and their supporting evidence-base including barriers and facilitators to their use.

**Methods and analysis:** Systematic searching of the published health literature will be conducted to identify existing ICU discharge planning tools and supporting evidence. Literature (research and non-research) reporting on tools used to facilitate decision making and/or communication at ICU discharge, with patients of any age will be included. Outcomes will include adverse events and provider and patient/family reported outcomes. Two investigators will independently review the abstracts (Screen 1) to identify those meeting inclusion criteria and then independently assess the full text articles (Screen 2) to determine if they meet inclusion criteria. Data collection will include information on citations and identified tools. A quality assessment will be performed on original research studies. A descriptive summary will be developed for each tool.

**Ethics and dissemination:** Our scoping review will synthesize the literature for ICU discharge planning tools and identify opportunities for knowledge to action and gaps in evidence where primary evidence is necessary. This will serve as the foundational element in a multi-step

1  
2  
3  
4  
5  
6  
7  
8  
9  
10  
11  
12  
13  
14  
15  
16  
17  
18  
19  
20  
21  
22  
23  
24  
25  
26  
27  
28  
29  
30  
31  
32  
33  
34  
35  
36  
37  
38  
39  
40  
41  
42  
43  
44  
45  
46  
47  
48  
49  
50  
51  
52  
53  
54  
55  
56  
57  
58  
59  
60

research program to standardize and improve the quality of care provided to patients during ICU discharge. Ethics approval is not required for this study.

For peer review only

## BACKGROUND

The transfer of responsibility for patient care (synonyms include transition of care, handoff, sign over etc.) is a common practice in acute-care hospitals.[1] During transfers of patient care, crucial information on patient conditions, tests undertaken, and treatments received is transferred between providers, so that care plans can be effectively continued by receiving providers. A handoff between health care providers is not only a process to provide accurate and vital information regarding a patients' care, but is also a transfer of accountability and responsibility for the patient.[2-7] Healthcare organizations recognize the importance of transitions of care and have proposed organizational practices to improve the effectiveness and coordination of communication among providers and recipients of care across the care continuum.[8-10]

Unfortunately, the practice of provider handoff is often suboptimal due to communication barriers[6, 11-13] and is a major contributor to medical errors and adverse events.[2, 7, 14-20] In 2006, the Joint Commission for Accreditation of Health Care Organization (JCAHO) reported that 63% of deaths related to medical error in its sentinel events database involved a breakdown in communication.[21] Most research on handoffs for in-hospital patient transfers has focused on patient transfers from the perspective of a single discipline, such as physician end-of-shift[1, 6, 12, 19, 22] or end-of-service[2, 17, 18, 23] handoffs. In contrast, relatively little is known about handoffs between non-physician providers.[11, 24] Multidisciplinary handoffs though are required to optimally transition care and likely face relatively greater communication hurdles due to cultural differences, work load challenges, and differences in clinical focus between specialties and disciplines, and thus may lead to greater potential for medical errors and adverse events.[11, 13, 24]

1  
2  
3  
4  
5  
6 Numerous types of patient transfers and provider handoffs occur every day.[4, 6] A transition of  
7  
8 care occurs each time a patient is referred to a specialist by their family doctor, assigned a new  
9  
10 nurse during hospital shift change or discharged from hospital. Among these, patient transfers  
11  
12 from the Intensive Care Unit (ICU) to a medical or surgical hospital ward are likely of  
13  
14 particularly high risk due to the number, complexity and acuity of the medical conditions that  
15  
16 characterize this patient group;[25-28] the large “voltage” drop in available resources when  
17  
18 patients move from the ICU, where medical care is intensive and resources are rich, to ward  
19  
20 environments, where patients typically receive much less intensive monitoring and patient  
21  
22 care;[25] the multitude of communication barriers that providers often face during inter-specialty  
23  
24 and multidisciplinary handoffs;[29] the lack of standardization in patient transfer processes  
25  
26 overall; and in particular the lack of standardized written and/or electronic tools to facilitate an  
27  
28 optimal transfer process.[27]  
29  
30  
31  
32  
33  
34  
35

36 Patients admitted to the ICU are of the highest acuity requiring management with life support  
37  
38 technologies and aggressive interventions to sustain life and progress towards a clinically  
39  
40 stabilized condition.[27] Approximately one in ten patients admitted to an acute care facility are  
41  
42 admitted to an ICU.[30] Transition of care is extremely common with 90% of ICU patients being  
43  
44 eventually discharged to medical or surgical hospital wards.[31] With millions of  
45  
46 hospitalizations in acute care facilities in most countries each year,[30] hundreds of thousands of  
47  
48 patients will be admitted to ICU and experience challenging and high risk transfers to hospital  
49  
50 wards.  
51  
52  
53  
54  
55  
56  
57  
58  
59  
60

1  
2  
3 ICU discharge represents a large drop in the intensity of care with patients transitioning from a  
4 high acuity unit to a general care unit. ICUs are specially staffed, self-contained hospital units,  
5 dedicated to the management and continuous monitoring of patients with life-threatening  
6 illnesses.[32] The medical support available to patients in the ICU includes multidisciplinary  
7 teams of healthcare providers (i.e. physicians, nurses, pharmacists, therapists) that typically see  
8 each patient multiple times a day.[33, 34] In general there is a nurse for every one or two patients  
9 and a physician for every eight to ten patients.[35, 36] In contrast, general medical and surgical  
10 care units have fewer resources with a nurse for every four to eight patients[37] and physicians  
11 responsible for up to as many as 65 patients during regular working hours and 400 patients  
12 outside of regular working hours.[38] Other health care providers are often less available.  
13  
14  
15  
16  
17  
18  
19  
20  
21  
22  
23  
24  
25  
26  
27  
28

29 When a patient is transferred from ICU to a general care unit typically there is a complete  
30 transition in healthcare providers, most patients being assigned new teams of physicians, nurses,  
31 pharmacists, therapists etc. However, communication between providers discharging patients  
32 from the ICU and providers admitting these patients to general care units has been documented  
33 to be infrequent, incomplete and of poor quality.[29, 39] An observational study done by our  
34 research team in preparation for this protocol found direct verbal communication between ICU  
35 discharging physicians and ward admitting physicians to occur in only 15-25% of the ICU  
36 discharges.[29] Optimal transfers of care require effective communication between discharging  
37 and admitting physicians that includes direct communication (in person or via telephone);  
38 concise, accurate, up-to-date discharge summaries; and physician notification at the time of  
39 transfer.[3, 29] However, communication during transfer is challenged by provider workloads,  
40 available resources, and variations in clinical focus between specialties.[11, 13, 24]  
41  
42  
43  
44  
45  
46  
47  
48  
49  
50  
51  
52  
53  
54  
55  
56  
57  
58  
59  
60

1  
2  
3  
4  
5  
6 Communication between physicians and patients/families at the time of ICU discharge is also  
7  
8 frequently suboptimal with the same local observational study finding 68% of patient/families  
9  
10 reporting a desire for increased opportunities to ask questions about the transfer.[29] This lack of  
11  
12 information about the ICU transfer process can act as a catalyst for stress and anxiety for patients  
13  
14 and families.[40-42] Effective communication between providers and patients/families to  
15  
16 provide early notification of an upcoming transfer,[29] and present information on current  
17  
18 medical conditions and future plans prior to transfer would likely better manage expectations and  
19  
20 reduce anxiety.  
21  
22  
23  
24  
25

26  
27 Standardizing the process of patient discharge from ICU could improve the safety, quality and  
28  
29 efficiency of care. Multiple interventions to improve ICU discharge have been developed (e.g.  
30  
31 transitional care units, ICU outreach, nursing liaison, etc.),[27, 43-46] but there is no consensus  
32  
33 on an ideal ICU discharge model to optimize the quality of patient care[27] and few  
34  
35 organizations have implemented standardized guidelines or procedures for transitions of  
36  
37 care.[44, 47] Government agencies,[48] specialty groups[3, 49, 50] and the Institute for  
38  
39 Healthcare Improvement[51] have all advocated standardizing ICU discharge structure and  
40  
41 processes to improve continuity of care, patient safety, patient and provider satisfaction, and  
42  
43 resource use.[45, 52]  
44  
45  
46  
47  
48  
49

50  
51 The challenges of ICU discharge are well recognized.[27, 53] Very little is known about the  
52  
53 quality of patient care during ICU discharge. A comprehensive review of ICU discharge  
54  
55 planning tools has not been previously completed. The scope and magnitude of tools to facilitate  
56  
57  
58  
59  
60



1  
2  
3 patient discharge from ICU has not previously been defined. For tools already developed, it is  
4  
5 unclear how effectively these have been implemented and how they may have affected patient  
6  
7 clinical outcomes and/or patient and family satisfaction with care. In response to these  
8  
9 challenges, we will conduct a scoping review to identify ICU discharge planning tools and the  
10  
11 supporting evidence base for these tools including barriers and facilitators to their use.  
12  
13  
14

## 17 METHODS AND ANALYSIS

### 19 Conceptual model

20  
21 Our scoping review will adopt the model of system theory first introduced in 1966 by Avedis  
22  
23 Donabedian.[54, 55] In Donabedian's framework, the three components of healthcare quality are  
24  
25 *structure*, *process* and *outcome*. The *structure* is the environment in which health care is  
26  
27 provided and includes material and health resources, operational factors, and organizational  
28  
29 characteristics of the healthcare facility. The *process* is the method by which healthcare is  
30  
31 provided and includes the giving and receiving of care by the providers and healthcare system.  
32  
33 The *outcome* is the consequence of healthcare and includes the health status of patients. We will  
34  
35 examine *structural* devices (tools) used to facilitate ICU discharge and evaluate their association  
36  
37 with *processes* and *outcomes* of care for patients discharged from ICU (Figure 1).  
38  
39  
40  
41  
42  
43  
44  
45

46 In addition, we will incorporate the Institute of Medicine's (IOM) six aims for the 21<sup>st</sup> Century  
47  
48 Health Care System into our research. ICU discharge tools should foster safe, effective, efficient,  
49  
50 timely, equitable, and patient-centered discharge from ICU. We have developed a conceptual  
51  
52 model for our scoping review that merges the Donabedian model and the IOM's six aims (Table  
53  
54  
55  
56  
57  
58  
59  
60  
1). We recognize that our conceptual model is a relatively basic and simple representation of

1  
2  
3 ICU discharge, but no other simple validated framework exists and we have successfully used a  
4  
5 variation of this model to develop quality indicators for injury care.[56-59]  
6  
7  
8  
9

## 10 **Objectives**

11  
12 This is a protocol for a scoping review to identify ICU discharge planning tools and the  
13 supporting evidence base for these tools including barriers and facilitators to their use. Methods  
14 for inclusion and analysis of articles and reporting of their results will be performed as  
15 recommended by Arksey and O'Malley[60] and refined by Levac and colleagues.[61]  
16  
17  
18  
19  
20  
21  
22  
23

24 We define an ICU as a distinct hospital ward that is staffed by specialized healthcare  
25 professionals and where immediate and continuous life sustaining treatment (e.g. invasive  
26 monitoring, vasoactive medications, invasive mechanical ventilation) is administered to  
27 hospitalized patients suffering from life-threatening conditions (e.g. severe respiratory  
28 failure).[35] Patient discharge from ICU is defined as the transfer of accountability and  
29 responsibility for patient care from the ICU to a hospital ward. Tools are defined as structural  
30 devices (e.g. protocols, reminders, order sets, bundles, checklists, forms, decision-aids) designed  
31 to aid health care providers or patients/families with decision making and/or communication.[62]  
32  
33  
34  
35  
36  
37  
38  
39  
40  
41  
42  
43  
44  
45

46 The specific objectives of the scoping review are:

- 47  
48 1. To complete a systematic search of the literature to identify existing ICU discharge planning  
49 tools and evaluate the evidence base in support of the tools.  
50  
51
- 52  
53 2. To map the ICU discharge tools and supporting evidence to our conceptual framework to  
54 identify gaps in the evidence where primary evidence or systematic reviews are required.  
55  
56  
57  
58  
59  
60

3. To evaluate the tools according to their relevance to knowledge users (importance, feasibility, usability, scientific acceptability).
4. To describe barriers and facilitators to implementation and utilization of ICU discharge planning tools.

### Eligibility Criteria

Research studies (no methodological restrictions – case series, cohort, cross-sectional, nonrandomized controlled, consensus method, case-control, randomized controlled) and non-research study designs (editorial, guideline, letter to the editor, narrative review) are eligible. We will include studies with all human patients discharged from any ICU regardless of subspecialty (e.g. medical, neuroscience, etc.). There is no restriction on age as tools identified for neonatal and pediatric patients may provide relevant information for the discharge of adult patients.

Eligible studies must include any electronic or paper tool (including guidelines, protocols, questionnaires, checklist, etc.) intended to facilitate discharge from ICU by aiding healthcare providers and/or patients/families with decision making and/or communication. A comparison group is not required as we will be looking for studies that describe the implementation or evaluation of a tool. If evaluation studies are identified, details on the comparison group will be assessed including patients and type of ICU (e.g. medical, neuroscience etc.). Outcome measures include (1) any severe adverse events post-ICU discharge (e.g. ICU readmission, hospital mortality), (2) any provider reported outcomes (e.g. quality of communication, satisfaction), or (3) any patient/family reported outcomes (e.g. quality of information, engagement, satisfaction).

1  
2  
3 Studies will be excluded if they include patient discharges predominantly from coronary care  
4  
5 units, high dependency units, and step-down units.  
6  
7  
8  
9

### 10 **Search Strategy**

11  
12 We will search the following electronic databases: Medline (OVID interface, 1946 onwards),  
13  
14 EMBASE (OVID interface, 1947 onwards), CINAHL (EBSCO interface, 1981 onwards) and the  
15  
16 Cochrane Library (current issue). Bibliographies of retrieved articles will be searched for  
17  
18 additional relevant articles. We will also search conference proceedings from the past five years,  
19  
20 including the Canadian Critical Care Conference, Society of Critical Care Medicine, Australian  
21  
22 and New Zealand Intensive Care Society Conference, European Society of Intensive Care  
23  
24 Medicine Conference, American Thoracic Society Conference, and International Symposium on  
25  
26 Intensive Care and Emergency Medicine. Experts in the field, identified from the references of  
27  
28 included studies, will be contacted to determine whether they are aware of any additional studies.  
29  
30  
31  
32  
33  
34  
35

36 An experienced information specialist (LP) will conduct the literature searches. They will be  
37  
38 performed with no year or language restrictions and will use combinations and synonyms of the  
39  
40 following search terms: intensive care, critical care, discharge plan, patient transfer and patient  
41  
42 discharge. Appropriate wildcards will be used to account for plurals and variations in spelling. A  
43  
44 draft literature search is available in Additional File 1.  
45  
46  
47  
48  
49

### 50 **Study selection process**

51  
52 Two investigators will independently review the retrieved abstracts (Screen 1) to identify those  
53  
54 that meet the inclusion criteria. The full text of those articles deemed relevant by either reviewer  
55  
56  
57  
58  
59  
60

1  
2  
3 will be obtained. Two investigators will independently assess the full text articles (Screen 2) to  
4  
5 determine if they meet the inclusion criteria. Two investigators will discuss disagreements on  
6  
7 inclusion and a third investigator will resolve disagreements if needed. Bibliographic details will  
8  
9 be downloaded to EndNote.[63] The study selection process will be pilot tested using 50  
10  
11 citations from the literature search. The inclusion and exclusion criteria will be serially clarified  
12  
13 and reviewer training sequentially revised until reliable study selection can be demonstrated  
14  
15 (estimated  $\kappa \geq 0.6$ ).[64]  
16  
17  
18  
19  
20  
21

### 22 **Data items and data collection process**

23  
24 The data collection instruments will include information on both citations and identified tools.  
25  
26 We will document the type of citation (e.g. original research), country, setting (e.g. subspecialty  
27  
28 of unit), study design, study population, recruitment and sampling, diagnostic criteria, reference  
29  
30 standard, blinding, statistical methods and outcomes. For each tool we will document the name,  
31  
32 purpose (e.g. risk stratification), components (single component vs. multi-component), how it is  
33  
34 applied (e.g. electronic) and the timing of activation (e.g. discharge planning vs. discharge  
35  
36 execution). If available, we will record any measurement properties documented  
37  
38 (sensitivity/specificity), reported impact on processes and outcomes of care for patients, families  
39  
40 and providers and barriers and facilitators identified to use of the tool. The data collection  
41  
42 instrument and reviewer training will be sequentially revised until reliable data abstraction can  
43  
44 be demonstrated (estimated  $\kappa \geq 0.8$ ).[64] Differences in coding between the two reviewers will  
45  
46 be resolved by discussion and a third reviewer consulted if an agreement cannot be reached.  
47  
48  
49 Original research studies will have the quality of their methodology assessed using the  
50  
51 framework of Caldwell et al.[65] for evaluating both quantitative and qualitative study designs.  
52  
53  
54  
55  
56  
57  
58  
59  
60

1  
2  
3 Two clinical decision-makers (Zygun, Boiteau, Zuege) will independently judge the relevance of  
4 each tool for decision-making according to four dimensions derived from the Strategic  
5 Framework Board in the United States:[66] 1) targets important improvements in continuity of  
6 patient care, 2) feasible to implement, 3) easy to use, 4) strength of scientific evidence (using the  
7 GRADE criteria).[67]

### 17 **Analysis**

18  
19 Quantitative and qualitative analyses will be performed. The articles and tools will be  
20 categorized according to their respective criteria. Agreement on data abstraction and article  
21 classification will be assessed with Cohen  $\kappa$  reliability coefficients.[64] A comprehensive list of  
22 the tools will be developed and summarized using simple numerical counts. We will present the  
23 distribution of tools according to the cells of our conceptual model along with binomial 95%  
24 confidence intervals as well as detailed tabulations by type of article (original research, non-  
25 research) and study design. We will examine the purpose and components of the tools from each  
26 study as well as reported measurement properties (e.g. sensitivity/specificity of risk stratification  
27 tools) and reported processes (e.g. hospital length of stay) and outcomes (e.g. readmission to  
28 ICU) of care. A descriptive summary will be developed of each tool's purpose, components,  
29 conceptual model classification, measurement properties and relevance to knowledge users.

30  
31  
32  
33  
34  
35  
36  
37  
38  
39  
40  
41  
42  
43  
44  
45  
46  
47  
48 Qualitative studies will be evaluated by identifying the key outcomes and themes presented by  
49 each study (e.g. reported barriers and facilitators to discharge tool utilization), preserving the  
50 meaning from their original source, and tabulating them within the review. Translation of key  
51 concepts from all studies will be performed to identify novel concepts not explored by individual  
52  
53  
54  
55  
56  
57  
58  
59  
60

1  
2  
3 studies. Analysis will focus on identifying the overlap of key concepts between studies. Finally,  
4  
5 the translated concepts will be synthesized and refined to identify core themes.[68]  
6  
7  
8  
9

10 Using the above categorization scheme, we will be able to provide a scoping review of what  
11  
12 research is available in the area of ICU discharge planning tools and the evidence base  
13  
14 supporting available tools. From this we will identify where there is a need for a systematic  
15  
16 review of the literature (e.g. there may be sufficient literature on validated risk stratification  
17  
18 techniques) and where gaps in the literature exist and primary prospective studies are needed.  
19  
20  
21  
22  
23

## 24 **ETHICS AND DISSEMINATION**

25  
26  
27 This scoping review is the first step in a major empiric work to measure and improve ICU  
28  
29 discharge processes (focused on adult patients). It will identify the fundamental information  
30  
31 needed to implement an ICU discharge planning tool. This review will identify existing tools to  
32  
33 facilitate ICU discharge, the supporting evidence base as well as facilitators and barriers to  
34  
35 implementation. All data will be obtained from publicly available materials, and therefore this  
36  
37 study will not require ethics approval.  
38  
39  
40  
41  
42

43 Our knowledge translation strategy will involve, among other approaches, a workshop to be held  
44  
45 in conjunction with the annual January Canadian Critical Care Trials Group meeting that will  
46  
47 bring together key target audiences across disciplines for our research. By engaging  
48  
49 multidisciplinary stakeholders we will enhance linkages necessary for dissemination of our  
50  
51 results. We will engage stakeholders in a discussion of the results and develop and prioritize a  
52  
53 research agenda for implementation of a standardized ICU discharge planning tool. We will  
54  
55  
56  
57  
58  
59  
60

1  
2  
3 publish in health services research and discipline-based journals. In addition, we will encourage  
4  
5 presentation of findings at health services research conferences at national and international  
6  
7 meetings including the annual meetings of the Canadian Critical Care Trials Group, and  
8  
9 International Symposium of Intensive Care and Emergency Medicine amongst others.  
10  
11

12  
13  
14  
15 Our scoping review results have the potential to influence the care of many patients. We will  
16  
17 synthesize the literature for ICU discharge planning tools and identify opportunities for  
18  
19 knowledge to action and gaps in evidence where primary evidence is necessary. ICUs are  
20  
21 specialized units that have been widely implemented around the world to care for the sickest  
22  
23 patients in the health care system.[53] Discharge from ICU is a high risk process because  
24  
25 vulnerable patients, move from a resource rich environment to a relatively resource poor  
26  
27 environment using a process that is non-standardized, inefficient and characterized by poor  
28  
29 communication and frequent adverse events.[28, 29, 39, 43, 44, 69, 70] To improve patient care  
30  
31 we need evidence-based tools to standardize and improve the quality of care provided to patients  
32  
33 during ICU discharge. Our results will help implement an evidence-based ICU discharge  
34  
35 planning tool to ensure that discharge from the ICU is safe, effective, efficient, timely, equitable  
36  
37 and patient-centered so that the *right patient* is discharged at the *right time* using a *process* that  
38  
39 improves patient care and reduces the risk of adverse events and hospital mortality while  
40  
41 facilitating patients' care journey.  
42  
43  
44  
45  
46  
47  
48  
49  
50  
51  
52  
53  
54  
55  
56  
57  
58  
59  
60



## References

1. Horwitz LI, Krumholz HM, Green ML, et al. Transfers of patient care between house staff on internal medicine wards: a national survey. *Arch Intern Med* 2006;**166**(11):1173-7.
2. Petersen LA, Brennan TA, O'Neil AC, et al. Does housestaff discontinuity of care increase the risk for preventable adverse events? *Ann Intern Med* 1994;**121**(11):866-72.
3. CCHSA patient/client safety goals and required organizational goals: evaluation of implementation and evidence of compliance. Version of 2.1 for use with 2007 standard. [<http://www.docstoc.com/docs/73078735/Organizational-Agreement>]
4. Coleman EA, Berenson RA. Lost in transition: challenges and opportunities for improving the quality of transitional care. *Ann Intern Med* 2004;**141**(7):533-6.
5. Patterson ES, Roth EM, Woods DD, et al. Handoff strategies in settings with high consequences for failure: lessons for health care operations. *Int J Qual Health Care* 2004;**16**(2):125-32.
6. Solet DJ, Norvell JM, Rutan GH, et al. Lost in translation: challenges and opportunities in physician-to-physician communication during patient handoffs. *Acad Med* 2005;**80**(12):1094-9.
7. Arora V, Johnson J, Lovinger D, et al. Communication failures in patient sign-out and suggestions for improvement: a critical incident analysis. *Qual Saf Health Care* 2005;**14**(6):401-7.
8. National Patient Safety Goals [[http://www.jointcommission.org/standards\\_information/npsgs.aspx](http://www.jointcommission.org/standards_information/npsgs.aspx)]
9. Required Organizational Practices [<http://www.accreditation.ca/knowledge-exchange/patient-safety/required-organizational-practices/>]
10. IHI Improvement Map: Patient Transitions & Handoffs [<http://app.ihi.org/imap/tool/#Process=21e273fb-81fc-4dd2-b89b-883c10afc4bc>]
11. Apker J, Mallak LA, Gibson SC. Communicating in the "gray zone": perceptions about emergency physician hospitalist handoffs and patient safety. *Acad Emerg Med* 2007;**14**(10):884-94.
12. Shojania KG, Fletcher KE, Saint S. Graduate medical education and patient safety: a busy--and occasionally hazardous--intersection. *Ann Intern Med* 2006;**145**(8):592-8.
13. Riesenber LA, Leitzsch J, Massucci JL, et al. Residents' and attending physicians' handoffs: a systematic review of the literature. *Acad Med* 2009;**84**(12):1775-87.
14. Andrews C, Millar S. Don't fumble the handoff. Inpatient providers, specialists, and the primary care physician: a medical care delivery system with benefits and complex risks. *J Med Assoc Ga* 2007;**96**(3):23-4.
15. Gandhi TK. Fumbled handoffs: one dropped ball after another. *Ann Intern Med* 2005;**142**(5):352-8.

16. Horwitz LI, Moin T, Krumholz HM, et al. Consequences of inadequate sign-out for patient care. *Arch Intern Med* 2008;**168**(16):1755-60.
17. Horwitz LI, Moin T, Krumholz HM, et al. What are covering doctors told about their patients? Analysis of sign-out among internal medicine house staff. *Qual Saf Health Care* 2009;**18**(4):248-55.
18. Kitch BT, Cooper JB, Zapol WM, et al. Handoffs causing patient harm: a survey of medical and surgical house staff. *Jt Comm J Qual Patient Saf* 2008;**34**(10):563-70.
19. Singh H, Thomas EJ, Petersen LA, et al. Medical errors involving trainees: a study of closed malpractice claims from 5 insurers. *Arch Intern Med* 2007;**167**(19):2030-6.
20. Sutcliffe KM, Lewton E, Rosenthal MM. Communication failures: an insidious contributor to medical mishaps. *Acad Med* 2004;**79**(2):186-94.
21. Joint Commission on Accreditation of Healthcare Organizations. Using medication reconciliation to prevent errors. *Sentinel Event Alert* 2006;(35):1-4.
22. Fletcher KE, Saint S, Mangrulkar RS. Balancing continuity of care with residents' limited work hours: defining the implications. *Acad Med* 2005;**80**(1):39-43.
23. Landucci D, Gipe BT. The art and science of the handoff: how hospitalists share data. *Hospitalist* 1999;**3**(1):4.
24. Horwitz LI, Meredith T, Schuur JD, et al. Dropping the baton: a qualitative analysis of failures during the transition from emergency department to inpatient care. *Ann Emerg Med* 2009;**53**(6):701-10, e4.
25. Cullen DJ, Sweitzer BJ, Bates DW, et al. Preventable adverse drug events in hospitalized patients: a comparative study of intensive care and general care units. *Crit Care Med* 1997;**25**(8):1289-97.
26. Voigt LP, Pastores SM, Raoof ND, Thaler HT, Halpern NA: Review of a large clinical series: intrahospital transport of critically ill patients: outcomes, timing, and patterns. *Journal of intensive care medicine* 2009, 24(2):108-15.
27. Watts R, Pierson J, Gardner H. Coordination of the discharge process planning in critical care. *J Clin Nurs* 2005;**21**:39-46.
28. Rosenberg AL, Watts C. Patients readmitted to ICUs\* : a systematic review of risk factors and outcomes. *Chest* 2000;**118**(2):492-502.
29. Li P, Stelfox HT, Ghali WA. A prospective observational study of physician handoff for intensive-care-unit-to-ward patient transfers. *Am J Med* 2011;**124**(9):860-7.
30. Leeb K, Jokovic A, Sandhu M, et al. CIHI survey: intensive care in Canada. *Healthc Q* 2006;**9**(1):32-3.

- 1
- 2
- 3
- 4
- 5 31. Russell S. Reducing readmissions to the intensive care unit. *Heart Lung* 1999;**28**(5):365-72.
- 6
- 7 32. Minimum Standards for Intensive Care Units [<http://www.cicm.org.au/cmsfiles/IC-01%20Minimum%20Standards%20For%20Intensive%20Care%20Units%20-%20Current%20September%202011.pdf>]
- 8
- 9
- 10
- 11 33. Dutton RP, Cooper C, Jones A, et al. Daily multidisciplinary rounds shorten length of stay for
- 12 trauma patients. *J Trauma* 2003;**55**(5):913-9.
- 13
- 14 34. Vazirani S, Hays RD, Shapiro MF, et al. Effect of a multidisciplinary intervention on
- 15 communication and collaboration among physicians and nurses. *Am J Crit Care* 2005;**14**(1):71-7.
- 16
- 17 35. Practicing CCM
- 18 [[http://www.sccm.org/AboutSCCM/Public%20Relations/Media\\_Kit/Pages/Practicing\\_CCM.aspx](http://www.sccm.org/AboutSCCM/Public%20Relations/Media_Kit/Pages/Practicing_CCM.aspx)]
- 19
- 20
- 21 36. Ward NS, Read R, Afessa B, et al. Perceived effects of attending physician workload in academic
- 22 medical intensive care units: a national survey of training program directors. *Crit Care Med*
- 23 2012;**40**(2):400-5.
- 24
- 25 37. Aiken LH, Clarke SP, Sloane DM, et al. Hospital nurse staffing and patient mortality, nurse
- 26 burnout, and job dissatisfaction. *JAMA* 2002;**288**(16):1987-93.
- 27
- 28 38. Goddard AF, Hodgson H, Newbery N. Impact of EWTD on patient:doctor ratios and working
- 29 practices for junior doctors in England and Wales 2009. *Clin Med* 2010;**10**(4):330-5.
- 30
- 31 39. Lin F, Chaboyer W, Wallis M. A literature review of organizational, individual, and teamwork
- 32 factors contributing to the ICU discharge process. *Aust Crit Care* 2009;**22**:29-43.
- 33
- 34 40. Leith BA. Patients' and family members' perceptions of transfer from intensive care. *Heart Lung*
- 35 1990;**28**(3):210-8.
- 36
- 37 41. Saarmann L. Transfer out of critical care: freedom or fear? *Crit Care Nurs Q* 1993;**16**(1):78-85.
- 38
- 39 42. Odell M. The patient's thoughts and feelings about their transfer from intensive care to the
- 40 general ward. *J Adv Nurs* 2000;**31**(2):322-9.
- 41
- 42 43. Kripalani S, Jackson AT, Schnipper JL, et al. Promoting effective transitions of care at hospital
- 43 discharge: a review of key issues for hospitalists. *J Hosp Med* 2007;**2**(5):314-23.
- 44
- 45 44. Heidegger C, Treggiari M, Romand J, et al. A nationwide survey of intensive care discharge
- 46 practice. *Intensive Care Med* 2005;**31**:1676-82.
- 47
- 48 45. Kripalani S, LeFevre F, Phillips C, et al. Deficits in Communication and Information Transfer
- 49 Between Hospital-Based and Primary Care Physicians. *JAMA* 2006;**297**(8):831-41.
- 50
- 51 46. Watts R, Pierson J, Gardner H. How do critical care nurses define the discharge process.
- 52 *Intensive Crit Care Nurs* 2004;**21**:39-46.
- 53
- 54
- 55
- 56
- 57
- 58
- 59
- 60

- 1  
2  
3  
4  
5 47. Levin P, Worner T, Sviri S, et al. Intensive care outflow limitation -- frequency, etiology, and  
6 impact. *J Crit Care* 2003;**18**(4):206-11.  
7  
8 48. Wachter RM. Making healthcare safer: a critical analysis of patient safety practices. In: Evidence  
9 Report No 43. Edited by Agency for Healthcare Quality Research, AHRQ publication 01-E058  
10 edn: Rockville, Md; 2001.  
11  
12 49. Critical access hospital: 2012 national patient safety goals  
13 [[http://www.jointcommission.org/assets/1/6/NPSG\\_Chapter\\_Jan2012\\_CAH.pdf](http://www.jointcommission.org/assets/1/6/NPSG_Chapter_Jan2012_CAH.pdf)]  
14  
15 50. Safe practices for better healthcare: A Consensus Report  
16 [<http://www.ahrq.gov/qual/nqfpract.pdf>]  
17  
18 51. Berwick DM, Calkins DR, McCannon CJ, et al. The 100,000 lives campaign: setting a goal and a  
19 deadline for improving health care quality. *JAMA* 2006;**295**(3):324-7.  
20  
21 52. Boutilier S. Leaving critical care: facilitating a smooth transition. *Dimens Crit Care Nurs*  
22 2007;**24**(4):137-42.  
23  
24 53. Wunsch H, Angus DC, Harrison DA, et al. Variation in critical care services across North America  
25 and Western Europe. *Crit Care Med* 2008;**36**(10):2787-93e2781-2789.  
26  
27 54. Donabedian A. The Definition of Quality and Approaches to Its Assessment. Ann Arbor, Michigan:  
28 Health Administration Press 1980.  
29  
30 55. Donabedian A. Evaluating the quality of medical care. *Milbank Q* 2005;**83**(4):691-729.  
31  
32 56. Stelfox HT, Bobranska-Artiuch B, Nathens A, et al. Quality indicators for evaluating trauma care:  
33 a scoping review. *Arch Surg* 2010;**145**(3):286-95.  
34  
35 57. Stelfox HT, Bobranska-Artiuch B, Nathens A, et al. A systematic review of quality indicators for  
36 evaluating pediatric trauma care. *Crit Care Med* 2010;**38**(4):1187-96.  
37  
38 58. Stelfox HT, Nathens AB, Straus SE, et al. Assessing care of patients with major traumatic injuries  
39 (Funding Reference #200803PH E-188220-PH M-CBBA-587 44). University of Calgary: Canadian  
40 Institutes of Health Research; 2008-10-01 to 2011-09-30.  
41  
42 59. Stelfox HT, Straus SE, Flemons WW, et al. Quality indicators in trauma care (Funding Reference  
43 #KRS-91770). University of Calgary: Canadian Institutes of Health Research; 2008-10-01 to 2009-  
44 09-30.  
45  
46 60. Arksey H, O'Malley L. Scoping studies: towards a methodological framework. *Int J Soc Res*  
47 *Methodol* 2005;**8**:19-32.  
48  
49 61. Levac D, Colquhoun H, O'Brien KK. Scoping studies: advancing the methodology. *Implement Sci*  
50 2010;**5**:69.  
51  
52  
53  
54  
55  
56  
57  
58  
59  
60

- 1  
2  
3  
4  
5  
6  
7  
8  
9  
10  
11  
12  
13  
14  
15  
16  
17  
18  
19  
20  
21  
22  
23  
24  
25  
26  
27  
28  
29  
30  
31  
32  
33  
34  
35  
36  
37  
38  
39  
40  
41  
42  
43  
44  
45  
46  
47  
48  
49  
50  
51  
52  
53  
54  
55  
56  
57  
58  
59  
60
62. AHRQ tools and resources for better health care  
[\[http://www.ahrq.gov/qual/tools/toolsria.htm#assessment\]](http://www.ahrq.gov/qual/tools/toolsria.htm#assessment)
63. EndNote X5. In. New York, NY: Thomson Reuter 2012.
64. Landis JR, Koch GG. The measurement of observer agreement for categorical data. *Biometrics* 1977;**33**(1):159-74.
65. Caldwell K, Henshaw L, Taylor G. Developing a framework for critiquing health research: An early evaluation. *Nurs Educ Today* 2011;**31**(8):e1-7.
66. McGlynn EA. Selecting common measures of quality and system performance. *Med Care* 2003;**41**(Suppl 1):I39-47.
67. Fan E, Laupacis A, Pronovost PJ, et al. How to use an article about quality improvement. *JAMA* 2010;**304**(20):2279-87.
68. Strauss A, Corbin J. Basics of Qualitative Research: Techniques and Procedures for Developing Grounded Theory, 2nd edn. Thousand Oaks, CA: Sage Publication 1998.
69. Hoyt DB, Hollingsworth-Fridlund P, Fortlage D, et al. An evaluation of provider-related and disease-related morbidity in a level I university trauma service: directions for quality improvement. *J Trauma* 1992;**33**(4):586-601.
70. Davis JW, Hoyt DB, McArdle MS, et al. The significance of critical care errors in causing preventable death in trauma patients in a trauma system. *J Trauma* 1991;**31**(6):813-8; discussion 818-9.

### List of Abbreviations

Intensive Care Unit, ICU

Institute of Medicine, IOM

### Authors' Contributions

Study concept: Stelfox, Perrier, Straus, Ghali, Zygun, Boiteau, Zuege

Study design: Stelfox, Perrier, Straus, Ghali, Zygun, Boiteau, Zuege

Obtained funding: Stelfox, Perrier, Straus, Ghali, Zygun, Boiteau, Zuege

1  
2  
3 Drafted protocol: Stelfox  
4

5 Edited protocol: Stelfox, Perrier, Straus, Ghali, Zygun, Boiteau, Zuege  
6  
7

8 Registered protocol: Stelfox  
9

10 All authors read and approved the final protocol.  
11  
12

### 13 14 15 **Competing Interests** 16

17 The authors declare they have no competing interests.  
18  
19

### 20 21 22 **Acknowledgements** 23

24 The project is supported by a Synthesis Grant (KRS124604) from the Canadian Institutes of  
25 Health Research. Dr. Stelfox is supported by a New Investigator Award from the Canadian  
26 Institutes of Health Research and a Population Health Investigator Award from Alberta  
27 Innovates Health Solutions. Dr Straus is funded by a Tier 1 Canada Research Chair. Dr Ghali is  
28 funded by a Senior Health Scholar Award from Alberta Innovates Health Solutions. Dr. Zygun is  
29 supported by a Clinical Investigator Award from Alberta Innovates. Funding sources had no role  
30 in the design of the protocol and we are unaware of any conflicts of interest. We thank Stephanie  
31 Todd for helping format our manuscript.  
32  
33  
34  
35  
36  
37  
38  
39  
40  
41  
42  
43  
44  
45  
46  
47  
48  
49  
50  
51  
52  
53  
54  
55  
56  
57  
58  
59  
60

**Table 1. Conceptual model of ICU discharge\***

| <b>IOM Aims</b>         | <b>Structure (Discharge Tool)</b> | <b>Process</b>        | <b>Outcome</b>         |
|-------------------------|-----------------------------------|-----------------------|------------------------|
| <b>Safe</b>             | Risk stratification               | Patient to right ward | ↓ ICU readmission      |
| <b>Effective</b>        | Medication reconciliation         | Right medications     | ↓ adverse event        |
| <b>Efficient</b>        | Information for providers         | Providers informed    | ↓ duplication of tests |
| <b>Timely</b>           | Risk stratification               | Discharged when ready | ↓ length of stay       |
| <b>Patient-Centered</b> | Information for patients          | Patients engaged      | ↑ Patient satisfaction |
| <b>Equitable</b>        | Checklist                         | Equal access          | ↓ inequalities         |

\*Table populated with sample tool components and consequent processes and outcomes

For peer review only

1  
2  
3 **Figure legends**

4  
5 Figure 1. Conceptual evidence-based ICU discharge planning tool  
6  
7  
8

9  
10 **Additional Files**

11  
12 File name: Additional File 1

13  
14 File format: PDF

15  
16  
17 Title of data: Draft Search Strategy for Medline

18  
19 Description of data: literature search strategy  
20  
21  
22  
23  
24  
25  
26  
27  
28  
29  
30  
31  
32  
33  
34  
35  
36  
37  
38  
39  
40  
41  
42  
43  
44  
45  
46  
47  
48  
49  
50  
51  
52  
53  
54  
55  
56  
57  
58  
59  
60

For peer review only



1  
2  
3  
4  
5  
6  
7  
8  
9  
10  
11  
12  
13  
14  
15  
16  
17  
18  
19  
20  
21  
22  
23  
24  
25  
26  
27  
28  
29  
30  
31  
32  
33  
34  
35  
36  
37  
38  
39  
40  
41  
42  
43  
44  
45  
46  
47  
48  
49  
50  
51  
52  
53  
54  
55  
56  
57  
58  
59  
60

Figure 1. Conceptual evidence-based ICU discharge planning tool

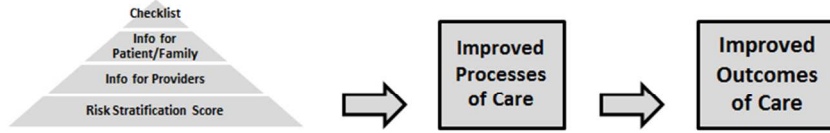

229x72mm (96 x 96 DPI)

peer review only

**Additional File 1. Draft Search Strategy for Medline:**

- 
- 1 (critical adj care).tw.
  - 2 (critical\$ adj ill\$).tw.
  - 3 (intensive adj care).mp.
  - 4 ICU?.tw.
  - 5 (cardiovascular adj unit?).tw.
  - 6 (coronary adj care).tw.
  - 7 CCU?.tw.
  - 8 (step-down adj unit?).tw.
  - 9 (burn adj unit?).tw.
  - 10 "high dependency unit?".tw.
  - 11 (neurosurgical adj unit?).tw.
  - 12 (observation adj unit?).tw.
  - 13 exp Intensive Care Units/
  - 14 exp Critical Care/
  - 15 Critical Illness/
  - 16 or/1-15
  - 17 (discharg\$ adj1 plan\$).tw.
  - 18 (discharg\$ adj1 process\$).tw.
  - 19 (discharg\$ adj1 protocol?).tw.
  - 20 (discharg\$ adj1 method\$).tw.
  - 21 (discharg\$ adj1 transition\$).tw.
  - 22 "discharg\$ of patient?".tw.
  - 23 (patient\$ adj1 transition\$).tw.
  - 24 (patient\$ adj1 discharg\$).tw.
  - 25 (patient\$ adj1 transfer\$).tw.
  - 26 (transfer\$ adj1 process\$).tw.
  - 27 (transfer\$ adj1 plan\$).tw.
  - 28 (transfer\$ adj3 ward\$).tw.
  - 29 "transfer\$ of patient?".tw.
  - 30 Patient Discharge/
  - 31 Patient Transfer/
  - 32 or/17-31
  - 33 16 and 32
  - 34 Animals/ not (Animals/ and Humans)
  - 35 33 not 34



## Identifying Intensive Care Unit Discharge Planning Tools: Protocol for a Scoping Review

|                                 |                                                                                                                                                                                                                                                                                                                                                                                                                                                                                                                                                                     |
|---------------------------------|---------------------------------------------------------------------------------------------------------------------------------------------------------------------------------------------------------------------------------------------------------------------------------------------------------------------------------------------------------------------------------------------------------------------------------------------------------------------------------------------------------------------------------------------------------------------|
| Journal:                        | <i>BMJ Open</i>                                                                                                                                                                                                                                                                                                                                                                                                                                                                                                                                                     |
| Manuscript ID:                  | bmjopen-2013-002653.R1                                                                                                                                                                                                                                                                                                                                                                                                                                                                                                                                              |
| Article Type:                   | Protocol                                                                                                                                                                                                                                                                                                                                                                                                                                                                                                                                                            |
| Date Submitted by the Author:   | 07-Mar-2013                                                                                                                                                                                                                                                                                                                                                                                                                                                                                                                                                         |
| Complete List of Authors:       | Stelfox, Henry; University of Calgary, Critical Care Medicine<br>Perrier, Laure; The Keenan Research Centre in the Li Ka Shing Knowledge Institute of St. Michael's Hospital,<br>Straus, Sharon; The Keenan Research Centre in the Li Ka Shing Knowledge Institute of St. Michael's Hospital,<br>Ghali, William; University of Calgary, Community Health Sciences<br>Zygun, David; University of Alberta, Critical Care Medicine<br>Boiteau, Paul; Alberta Health Services, Critical Care Medicine<br>Zuege, Danny; Alberta Health Services, Critical Care Medicine |
| <b>Primary Subject Heading</b>: | Intensive care                                                                                                                                                                                                                                                                                                                                                                                                                                                                                                                                                      |
| Secondary Subject Heading:      | Health services research                                                                                                                                                                                                                                                                                                                                                                                                                                                                                                                                            |
| Keywords:                       | Protocols & guidelines < HEALTH SERVICES ADMINISTRATION & MANAGEMENT, Quality in health care < HEALTH SERVICES ADMINISTRATION & MANAGEMENT, INTENSIVE & CRITICAL CARE                                                                                                                                                                                                                                                                                                                                                                                               |
|                                 |                                                                                                                                                                                                                                                                                                                                                                                                                                                                                                                                                                     |

SCHOLARONE™  
Manuscripts

only

## Identifying Intensive Care Unit Discharge Planning Tools: Protocol for a Scoping Review

Henry T Stelfox, MD, PhD, FRCPC<sup>1-4</sup> (tstelfox@ucalgary.ca)

Laure Perrier, MEd, MLIS<sup>5,6</sup> (l.perrier@utoronto.ca)

Sharon E Straus, MD, MSc, FRCPC<sup>7</sup> (sharon.straus@utoronto.ca)

William A Ghali, MD, MPH, FRCPC<sup>2-4</sup> (wghali@ucalgary.ca)

David Zygun, MD, MSc, FRCPC<sup>8,9</sup> (zygun@ualberta.ca)

Paul Boiteau, MD, FRCPC<sup>1</sup> (paul.boiteau@albertahealthservices.ca)

Danny J Zuege, MD, MSc, FRCPC<sup>1,2</sup> (dan.zuege@albertahealthservices.ca)

### Affiliations:

1. Department of Critical Care Medicine, University of Calgary and Alberta Health Services – Calgary Zone

2. Department of Medicine, University of Calgary and Alberta Health Services – Calgary Zone

3. Department of Community Health Sciences, University of Calgary

4. Institute for Public Health, University of Calgary

5. Li Ka Shing Knowledge Institute, Saint Michael's Hospital

6. Continuing Education & Professional Development, Faculty of Medicine, University of Toronto

7. Saint Michael's Hospital, Department of Medicine, University of Toronto

8. Division of Critical Care, University of Alberta

9. Department of Critical Care Medicine, Alberta Health Services – Edmonton Zone

Keywords: Scoping review, continuity of care, transitions of care, intensive care unit, discharge.

Word Count: 3,438

Correspondence: Henry Thomas Stelfox

Teaching Research & Wellness Building, University of Calgary

3280 Hospital Drive NW, Calgary, AB, Canada, T2N 4Z6

Tel: (403) 944-2334, Fax: (403) 283-9994

March 7, 2013

## ABSTRACT

**Background:** Transitions of care between providers are vulnerable periods in health care delivery that expose patients to preventable errors and adverse events. Patient discharge from the intensive care unit (ICU) to a medical or surgical hospital ward is one of the most challenging and high risk transitions of care. Approximately one in twelve patients discharged will be readmitted to ICU or die before leaving hospital. Many more patients are exposed to unnecessary health care, adverse events and/or are disappointed with the quality of their care. Our objective is to conduct a scoping review by systematically searching the literature to identify ICU discharge planning tools and their supporting evidence-base including barriers and facilitators to their use.

**Methods and analysis:** Systematic searching of the published health literature will be conducted to identify existing ICU discharge planning tools and supporting evidence. Literature (research and non-research) reporting on tools used to facilitate decision making and/or communication at ICU discharge, with patients of any age will be included. Outcomes will include adverse events and provider and patient/family reported outcomes. Two investigators will independently review the abstracts (Screen 1) to identify those meeting inclusion criteria and then independently assess the full text articles (Screen 2) to determine if they meet inclusion criteria. Data collection will include information on citations and identified tools. A quality assessment will be performed on original research studies. A descriptive summary will be developed for each tool.

**Ethics and dissemination:** Our scoping review will synthesize the literature for ICU discharge planning tools and identify opportunities for knowledge to action and gaps in evidence where primary evidence is necessary. This will serve as the foundational element in a multi-step

1  
2  
3  
4  
5  
6  
7  
8  
9  
10  
11  
12  
13  
14  
15  
16  
17  
18  
19  
20  
21  
22  
23  
24  
25  
26  
27  
28  
29  
30  
31  
32  
33  
34  
35  
36  
37  
38  
39  
40  
41  
42  
43  
44  
45  
46  
47  
48  
49  
50  
51  
52  
53  
54  
55  
56  
57  
58  
59  
60

55 research program to standardize and improve the quality of care provided to patients during ICU  
56 discharge. Ethics approval is not required for this study.

57

For peer review only

## 58 BACKGROUND

59 The transfer of responsibility for patient care (synonyms include transition of care, handoff, sign  
60 over etc.) is a common practice in acute-care hospitals.[1] During transfers of patient care,  
61 crucial information on patient conditions, tests undertaken, and treatments received is transferred  
62 between providers, so that care plans can be effectively continued by receiving providers. A  
63 handoff between health care providers is not only a process to provide accurate and vital  
64 information regarding a patients' care, but is also a transfer of accountability and responsibility  
65 for patient care.[2-7] Healthcare organizations recognize the importance of transitions of care  
66 and have proposed organizational practices to improve the effectiveness and coordination of  
67 communication among providers and recipients of care across the care continuum.[3, 8, 9]

68  
69 Unfortunately, the practice of provider handoff is often suboptimal due to communication  
70 barriers[6, 10-12] and is a major contributor to medical errors and adverse events.[2, 7, 13-19]  
71 The Harvard Medical Practice Study[20] found that adverse events occur in approximately 4% of  
72 patients discharged from hospital, with three quarters of these adverse events resulting in patient  
73 disability (ranging from less than one month duration to permanent) . A similar Australian study  
74 reported adverse events resulting in disability or increased length of stay for 17% of patients  
75 admitted to hospital.[21] In 2006, the Joint Commission for Accreditation of Health Care  
76 Organization (JCAHO) reported that 63% of deaths related to medical error in its sentinel events  
77 database involved a breakdown in communication.[22] Most research on handoffs for in-hospital  
78 patient transfers has focused on patient transfers from the perspective of a single discipline, such  
79 as physician end-of-shift[1, 6, 11, 18, 23] or end-of-service[2, 16, 17, 24] handoffs. In contrast,  
80 relatively little is known about handoffs between non-physician providers.[10, 25]

1  
2  
3 81 Multidisciplinary handoffs though are required to optimally transition care and likely face  
4  
5 82 relatively greater communication hurdles due to cultural differences, work load challenges, and  
6  
7 83 differences in clinical focus between specialties and disciplines, and thus may lead to greater  
8  
9  
10 84 potential for medical errors and adverse events.[10, 12, 25]  
11  
12  
13 85

14  
15 86 Numerous types of patient transfers and provider handoffs occur every day.[4, 6] A transition of  
16  
17 87 care occurs each time a patient is referred to a specialist by their family doctor, assigned a new  
18  
19 88 nurse during hospital shift change or discharged from hospital. Among these, patient transfers  
20  
21 89 from the Intensive Care Unit (ICU) to a medical or surgical hospital ward are likely of  
22  
23 90 particularly high risk due to the number, complexity and acuity of the medical conditions that  
24  
25 91 characterize this patient group;[26-29] the large “voltage” drop in available resources when  
26  
27 92 patients move from the ICU, where medical care is intensive and resources are rich, to ward  
28  
29 93 environments, where patients typically receive much less intensive monitoring and patient  
30  
31 94 care;[26] the multitude of communication barriers that providers often face during inter-specialty  
32  
33 95 and multidisciplinary handoffs;[30] the lack of standardization in patient transfer processes  
34  
35 96 overall; and in particular the lack of standardized written and/or electronic tools to facilitate an  
36  
37 97 optimal transfer process.[28]  
38  
39  
40  
41  
42  
43  
44  
45

46 99 Patients admitted to the ICU are of the highest acuity requiring management with life support  
47  
48 100 technologies and aggressive interventions to sustain life and progress towards a clinically  
49  
50 101 stabilized condition.[28] Approximately one in ten patients admitted to an acute care facility are  
51  
52 102 admitted to an ICU.[31] Transition of care is extremely common with 90% of ICU patients being  
53  
54 103 eventually discharged to medical or surgical hospital wards.[32] With millions of  
55  
56  
57  
58  
59  
60



1  
2  
3 104 hospitalizations in acute care facilities in most countries each year,[31] hundreds of thousands of  
4  
5 105 patients will be admitted to ICU and experience challenging and high risk transfers to hospital  
6  
7  
8 106 wards.  
9

10  
11 107  
12  
13 108 ICU discharge represents a large drop in the intensity of care with patients transitioning from a  
14  
15 109 high acuity unit to a general care unit. ICUs are specially staffed, self-contained hospital units,  
16  
17 110 dedicated to the management and continuous monitoring of patients with life-threatening  
18  
19 111 illnesses.[33] The medical support available to patients in the ICU includes multidisciplinary  
20  
21 112 teams of healthcare providers (i.e. physicians, nurses, pharmacists, therapists) that typically see  
22  
23 113 each patient multiple times a day.[34, 35] In general there is a nurse for every one or two patients  
24  
25 114 and a physician for every eight to ten patients.[36, 37] In contrast, general medical and surgical  
26  
27 115 care units have fewer resources with a nurse for every four to eight patients[38] and physicians  
28  
29 116 responsible for up to as many as 65 patients during regular working hours and 400 patients  
30  
31 117 outside of regular working hours.[39] Other health care providers are often less available.  
32  
33  
34  
35  
36  
37  
38

39 119 When a patient is transferred from ICU to a general care unit typically there is a complete  
40  
41 120 transition in healthcare providers, most patients being assigned new teams of physicians, nurses,  
42  
43 121 pharmacists, therapists etc. However, communication between providers discharging patients  
44  
45 122 from the ICU and providers admitting these patients to general care units has been documented  
46  
47 123 to be infrequent, incomplete and of poor quality.[30, 40] An observational study done by our  
48  
49 124 research team in preparation for this protocol found direct verbal communication between ICU  
50  
51 125 discharging physicians and ward admitting physicians to occur in only 15-25% of the ICU  
52  
53 126 discharges.[30] Optimal transfers of care require effective communication between discharging  
54  
55  
56  
57  
58  
59  
60

1  
2  
3 127 and admitting physicians that includes direct communication (in person or via telephone);  
4  
5  
6 128 concise, accurate, up-to-date discharge summaries; and physician notification at the time of  
7  
8 129 transfer.[3, 30] However, communication during transfer is challenged by provider workloads,  
9  
10  
11 130 available resources, and variations in clinical focus between specialties.[10, 12, 25]  
12  
13 131  
14  
15 132 Communication between physicians and patients/families at the time of ICU discharge is also  
16  
17 133 frequently suboptimal with the same local observational study finding 68% of patient/families  
18  
19  
20 134 reporting a desire for increased opportunities to ask questions about the transfer.[30] This lack of  
21  
22 135 information about the ICU transfer process appears to be associated with patient and family  
23  
24 136 anxiety.[41-44]Effective communication between providers and patients/families to provide  
25  
26  
27 137 early notification of an upcoming transfer,[30] and present information on current medical  
28  
29 138 conditions and future plans prior to transfer would likely better manage expectations and reduce  
30  
31  
32 139 anxiety.  
33  
34 140  
35  
36 141 Standardizing the process of patient discharge from ICU could improve the safety, quality and  
37  
38 142 efficiency of care. Multiple interventions to improve ICU discharge have been developed (e.g.  
39  
40 143 transitional care units, ICU outreach, nursing liaison, etc.),[28, 45-48] but there is no consensus  
41  
42  
43 144 on an ideal ICU discharge model to optimize the quality of patient care[28] and few  
44  
45  
46 145 organizations have implemented standardized guidelines or procedures for transitions of  
47  
48 146 care.[46, 49] Government agencies,[50] specialty groups[3, 51, 52] and the Institute for  
49  
50  
51 147 Healthcare Improvement[53] have all advocated standardizing ICU discharge structure and  
52  
53 148 processes to improve continuity of care, patient safety, patient and provider satisfaction, and  
54  
55 149 resource use.[47, 54]  
56  
57  
58  
59  
60

1  
2  
3 150  
4  
5  
6 151 The challenges of ICU discharge are well recognized.[28, 55] Very little is known about the  
7  
8 152 quality of patient care during ICU discharge. A comprehensive review of ICU discharge  
9  
10 153 planning tools has not been previously completed. The scope and magnitude of tools to facilitate  
11  
12 154 patient discharge from ICU has not previously been defined. For tools already developed, it is  
13  
14 155 unclear how effectively these have been implemented and how they may have affected patient  
15  
16 156 clinical outcomes and/or patient and family satisfaction with care. In response to these  
17  
18 157 challenges, we will conduct a scoping review to identify ICU discharge planning tools and the  
19  
20 158 supporting evidence base for these tools including barriers and facilitators to their use.  
21  
22  
23  
24  
25  
26

## 27 160 **METHODS AND ANALYSIS**

### 28 29 161 **Conceptual model**

30  
31 162 Our scoping review will adopt the model of system theory first introduced in 1966 by Avedis  
32  
33 163 Donabedian.[56, 57] In Donabedian's framework, the three components of healthcare quality are  
34  
35 164 *structure, process* and *outcome*. The *structure* is the environment in which health care is  
36  
37 165 provided and includes material and health resources, operational factors, and organizational  
38  
39 166 characteristics of the healthcare facility. The *process* is the method by which healthcare is  
40  
41 167 provided and includes the giving and receiving of care by the providers and healthcare system.  
42  
43 168 The *outcome* is the consequence of healthcare and includes the health status of patients. We will  
44  
45 169 examine *structural* devices (tools) used to facilitate ICU discharge and evaluate their association  
46  
47 170 with *processes* and *outcomes* of care for patients discharged from ICU (Figure 1).  
48  
49  
50  
51  
52

53 171  
54  
55  
56  
57  
58  
59  
60

1  
2  
3 172 In addition, we will incorporate the Institute of Medicine's (IOM) six aims for the 21<sup>st</sup> Century  
4  
5 173 Health Care System into our research. ICU discharge tools should foster safe, effective, efficient,  
6  
7  
8 174 timely, equitable, and patient-centered discharge from ICU. We have developed a conceptual  
9  
10 175 model for our scoping review that merges the Donabedian model and the IOM's six aims (Table  
11  
12 176 1). We recognize that our conceptual model is a relatively basic and simple representation of  
13  
14  
15 177 ICU discharge, but no other simple validated framework exists and we have successfully used a  
16  
17 178 variation of this model to develop quality indicators for injury care.[58-61]  
18  
19  
20 179

## 21 22 180 **Objectives**

23  
24 181 This is a protocol for a scoping review to identify ICU discharge planning tools and the  
25  
26  
27 182 supporting evidence base for these tools including barriers and facilitators to their use. Methods  
28  
29 183 for inclusion and analysis of articles and reporting of their results will be performed as  
30  
31 184 recommended by Arksey and O'Malley[62] and refined by Levac and colleagues.[63]  
32  
33  
34 185

35  
36 186 We define an ICU as a distinct hospital ward that is staffed by specialized healthcare  
37  
38 187 professionals and where immediate and continuous life sustaining treatment (e.g. invasive  
39  
40 188 monitoring, vasoactive medications, invasive mechanical ventilation) is administered to  
41  
42  
43 189 hospitalized patients suffering from life-threatening conditions (e.g. severe respiratory  
44  
45 190 failure).[36] Patient discharge from ICU is defined as the transfer of accountability and  
46  
47  
48 191 responsibility for patient care from the ICU to a hospital ward. Tools are defined as structural  
49  
50 192 devices (e.g. protocols, reminders, order sets, bundles, checklists, forms, decision-aids) designed  
51  
52 193 to aid health care providers or patients/families with decision making and/or communication.[64]  
53  
54  
55 194

1  
2  
3 195 The specific objectives of the scoping review are:  
4

5  
6 196 1. To complete a systematic search of the literature to identify existing ICU discharge planning  
7  
8 197 tools and evaluate the evidence base in support of the tools (including impact on patient  
9  
10 198 outcomes).

11  
12  
13 199 2. To map the ICU discharge tools and supporting evidence to our conceptual framework to  
14  
15 200 identify gaps in the evidence where primary evidence or systematic reviews are required.

16  
17 201 3. To evaluate the tools according to their relevance to knowledge users (importance, feasibility,  
18  
19 202 usability, scientific acceptability).

20  
21 203 4. To describe barriers and facilitators to implementation and utilization of ICU discharge  
22  
23 204 planning tools.  
24  
25  
26

27 205

### 28 29 206 **Eligibility Criteria**

30  
31 207 Research studies (no methodological restrictions – case series, cohort, cross-sectional,  
32  
33 208 nonrandomized controlled, consensus method, case-control, randomized controlled) and non-  
34  
35 209 research study designs (editorial, guideline, letter to the editor, narrative review) are eligible. We  
36  
37 210 will include studies with all human patients discharged from any ICU regardless of subspecialty  
38  
39 211 (e.g. medical, neuroscience, etc.). There is no restriction on age as tools identified for neonatal  
40  
41 212 and pediatric patients may provide relevant information for the discharge of adult patients (and  
42  
43 213 vice versa).  
44  
45  
46  
47

48 214

49  
50 215 Eligible studies must include an electronic or paper tool (including guidelines, protocols,  
51

52  
53 216 questionnaires, checklist, etc.) intended to facilitate discharge from ICU (regardless of discharge  
54  
55 217 destination) either by providing decision-support for healthcare providers and/or  
56  
57  
58  
59  
60

1  
2  
3 218 patients/families to determine readiness for discharge or aid in guiding the process of patient  
4  
5 219 discharge. A comparison group is not required as we will be looking for studies that describe the  
6  
7  
8 220 development, implementation or evaluation of a tool. If evaluation studies are identified, details  
9  
10 221 on the comparison group will be assessed including patients, type of ICU (e.g. medical,  
11  
12 222 neuroscience etc.) and discharge destination (e.g. high dependency step down unit, hospital ward  
13  
14 223 etc.). Outcome measures will include (1) any severe adverse events post-ICU discharge (e.g. ICU  
15  
16 224 readmission, hospital mortality), (2) any provider reported outcomes (e.g. quality of  
17  
18 225 communication, satisfaction), or (3) any patient/family reported outcomes (e.g. quality of  
19  
20 226 information, engagement, satisfaction).  
21  
22  
23  
24 227  
25  
26  
27 228 Studies will be excluded if they include patient discharges predominantly from coronary care  
28  
29 229 units, high dependency units, and step-down units.  
30  
31  
32 230

### 33 34 231 **Search Strategy**

35  
36 232 We will search the following electronic databases: Medline (OVID interface, 1946 onwards),  
37  
38 233 EMBASE (OVID interface, 1947 onwards), CINAHL (EBSCO interface, 1981 onwards) and the  
39  
40 234 Cochrane Library (current issue). Bibliographies of retrieved articles will be searched for  
41  
42 235 additional relevant articles. We will also search conference proceedings from the past five years,  
43  
44 236 including the Canadian Critical Care Conference, Society of Critical Care Medicine, Australian  
45  
46 237 and New Zealand Intensive Care Society Conference, European Society of Intensive Care  
47  
48 238 Medicine Conference, American Thoracic Society Conference, and International Symposium on  
49  
50 239 Intensive Care and Emergency Medicine. Experts in the field, identified from the references of  
51  
52 240 included studies, will be contacted to determine whether they are aware of any additional studies.  
53  
54  
55  
56  
57  
58  
59  
60

1  
2  
3 241  
4  
5  
6 242 An experienced information specialist (LP) will conduct the literature searches. They will be  
7  
8 243 performed with no year or language restrictions and will use combinations and synonyms of the  
9  
10 244 following search terms: intensive care, critical care, discharge plan, patient transfer and patient  
11  
12 245 discharge. Appropriate wildcards will be used to account for plurals and variations in spelling. A  
13  
14 246 draft literature search is available in Additional File 1.  
15  
16  
17  
18 247

### 20 248 **Study selection process**

21  
22 249 Two investigators will independently review the retrieved abstracts (Screen 1) to identify those  
23  
24 250 that meet the inclusion criteria. The full text of those articles deemed relevant by either reviewer  
25  
26 251 will be obtained. Two investigators will independently assess the full text articles (Screen 2) to  
27  
28 252 determine if they meet the inclusion criteria. Two investigators will discuss disagreements on  
29  
30 253 inclusion and a third investigator will resolve disagreements if needed. Bibliographic details will  
31  
32 254 be downloaded to EndNote.[65] The study selection process will be pilot tested using 50  
33  
34 255 citations from the literature search. The inclusion and exclusion criteria will be serially clarified  
35  
36 256 and reviewer training sequentially revised until reliable study selection can be demonstrated  
37  
38  
39 257 (estimated  $\kappa \geq 0.6$ ).[66]  
40  
41  
42  
43  
44 258

### 46 259 **Data items and data collection process**

47  
48 260 The data collection instruments will include information on both citations and identified tools.  
49  
50 261 We will document the type of citation (e.g. original research), country, setting (e.g. subspecialty  
51  
52 262 of unit), study design, study population, recruitment and sampling, diagnostic criteria, reference  
53  
54 263 standard, blinding, statistical methods and outcomes. For each tool we will document the name,  
55  
56  
57  
58  
59  
60

1  
2  
3 264 purpose (e.g. patient evaluation for discharge, planning patient discharge etc.), components  
4  
5  
6 265 (single component vs. multi-component), how it is applied (e.g. electronic) and the timing of  
7  
8 266 activation (e.g. discharge planning vs. discharge execution). If available, we will record any  
9  
10  
11 267 measurement properties documented (sensitivity/specificity), reported impact on processes (e.g.  
12  
13 268 medication reconciliation) and outcomes (e.g. patient readmission to ICU) of care for patients,  
14  
15 269 families and providers and barriers and facilitators identified to use of the tool (e.g.  
16  
17  
18 270 organizational culture). The data collection instrument and reviewer training will be sequentially  
19  
20 271 revised until reliable data abstraction can be demonstrated (estimated  $\kappa \geq 0.8$ ).[66] Differences in  
21  
22 272 coding between the two reviewers will be resolved by discussion and a third reviewer consulted  
23  
24  
25 273 if an agreement cannot be reached. Original research studies will have the quality of their  
26  
27 274 methodology assessed using the framework of Caldwell et al.[67] for evaluating both  
28  
29 275 quantitative and qualitative study designs. Two clinical decision-makers (Zygun, Boiteau,  
30  
31 276 Zuege) will independently judge the relevance of each tool for decision-making according to  
32  
33  
34 277 four dimensions derived from the Strategic Framework Board in the United States:[68] 1) targets  
35  
36 278 important improvements in continuity of patient care, 2) feasible to implement, 3) easy to use, 4)  
37  
38  
39 279 strength of scientific evidence (using the GRADE criteria).[69]  
40  
41  
42  
43

## 44 281 **Analysis**

45  
46 282 Quantitative and qualitative analyses will be performed. The articles and tools will be  
47  
48 283 categorized according to their respective criteria. Agreement on data abstraction and article  
49  
50  
51 284 classification will be assessed with Cohen  $\kappa$  reliability coefficients.[66] A comprehensive list of  
52  
53 285 the tools will be developed and summarized using simple numerical counts. We will present the  
54  
55  
56 286 distribution of tools according to the cells of our conceptual model along with binomial 95%  
57  
58  
59  
60



1  
2  
3 287 confidence intervals as well as detailed tabulations by type of article (original research, non-  
4  
5  
6 288 research) and study design. We will examine the purpose and components of the tools from each  
7  
8 289 study as well as reported measurement properties (e.g. sensitivity/specificity of risk stratification  
9  
10  
11 290 tools) and reported processes (e.g. hospital length of stay) and outcomes (e.g. readmission to  
12  
13 291 ICU) of care. A descriptive summary will be developed of each tool's purpose, components,  
14  
15 292 conceptual model classification, measurement properties and relevance to knowledge users.  
16  
17  
18 293

19  
20 294 Qualitative studies will be evaluated by identifying the key outcomes and themes presented by  
21  
22 295 each study (e.g. reported barriers and facilitators to discharge tool utilization), preserving the  
23  
24 296 meaning from their original source, and tabulating them within the review. Translation of key  
25  
26  
27 297 concepts from all studies will be performed to identify novel concepts not explored by individual  
28  
29 298 studies. Analysis will focus on identifying the overlap of key concepts between studies. Finally,  
30  
31 299 the translated concepts will be synthesized and refined to identify core themes.[70]  
32  
33

34 300  
35  
36 301 Using the above categorization scheme, we will be able to provide a scoping review of what  
37  
38 302 research is available in the area of ICU discharge planning tools and the evidence base  
39  
40  
41 303 supporting available tools. From this we will identify where there is a need for a systematic  
42  
43 304 review of the literature (e.g. there may be sufficient literature on validated risk stratification  
44  
45 305 techniques) and where gaps in the literature exist and primary prospective studies are needed.  
46  
47  
48 306

## 50 307 **ETHICS AND DISSEMINATION**

51  
52  
53 308 This scoping review is the first step in a major empiric work to measure and improve ICU  
54  
55 309 discharge processes (focused on adult patients). It will identify the fundamental information  
56  
57  
58  
59  
60

1  
2  
3 310 needed to implement an ICU discharge planning tool. This review will identify existing tools to  
4  
5 311 facilitate ICU discharge, the supporting evidence base as well as facilitators and barriers to  
6  
7 312 implementation. All data will be obtained from publicly available materials, and therefore this  
8  
9 313 study will not require ethics approval.  
10  
11  
12  
13 314

14  
15 315 Our knowledge translation strategy will involve, among other approaches, a workshop to be held  
16  
17 316 in conjunction with the annual January Canadian Critical Care Trials Group meeting that will  
18  
19 317 bring together key target audiences across disciplines for our research. By engaging  
20  
21 318 multidisciplinary stakeholders we will enhance linkages necessary for dissemination of our  
22  
23 319 results. We will engage stakeholders in a discussion of the results and develop and prioritize a  
24  
25 320 research agenda for implementation of a standardized ICU discharge planning tool. We will  
26  
27 321 publish in health services research and discipline-based journals. In addition, we will encourage  
28  
29 322 presentation of findings at health services research conferences at national and international  
30  
31 323 meetings including the annual meetings of the Canadian Critical Care Trials Group, and  
32  
33 324 International Symposium of Intensive Care and Emergency Medicine amongst others.  
34  
35  
36  
37  
38  
39 325

40  
41 326 Our scoping review results have the potential to influence the care of many patients. We will  
42  
43 327 synthesize the literature for ICU discharge planning tools and identify opportunities for  
44  
45 328 knowledge to action and gaps in evidence where primary evidence is necessary. ICUs are  
46  
47 329 specialized units that have been widely implemented around the world to care for the sickest  
48  
49 330 patients in the health care system.[55] Discharge from ICU is a high risk process because  
50  
51 331 vulnerable patients, move from a resource rich environment to a relatively resource poor  
52  
53 332 environment using a process that is non-standardized, inefficient and characterized by poor  
54  
55  
56  
57  
58  
59  
60

1  
2  
3 333 communication and frequent adverse events.[29, 30, 40, 45, 46, 71, 72] To improve patient care  
4  
5  
6 334 we need evidence-based tools to standardize and improve the quality of care provided to patients  
7  
8 335 during ICU discharge. Our results will help implement an evidence-based ICU discharge  
9  
10 336 planning tool to ensure that discharge from the ICU is safe, effective, efficient, timely, equitable  
11  
12 337 and patient-centered so that the *right patient* is discharged at the *right time* using a *process* that  
13  
14 338 improves patient care and reduces the risk of adverse events and hospital mortality while  
15  
16  
17 339 facilitating patients' care journeys.  
18  
19  
20 340  
21  
22  
23  
24  
25  
26  
27  
28  
29  
30  
31  
32  
33  
34  
35  
36  
37  
38  
39  
40  
41  
42  
43  
44  
45  
46  
47  
48  
49  
50  
51  
52  
53  
54  
55  
56  
57  
58  
59  
60

## References

1. Horwitz LI, Krumholz HM, Green ML, et al: **Transfers of patient care between house staff on internal medicine wards: a national survey.** *Archives of internal medicine* 2006, **166**(11):1173-1177.
2. Petersen LA, Brennan TA, O'Neil AC, et al. Does housestaff discontinuity of care increase the risk for preventable adverse events? *Ann Intern Med* 1994;**121**(11):866-72.
3. Canadian Council on Health Service Accreditation. CCHSA patient/client safety goals and required organizational goals: evaluation of implementation and evidence of compliance. Version of 2.1 for use with 2007 standard. <http://www.accreditation.ca/uploadedFiles/CHAR-2012-en.pdf>. Accessed March 12, 2012.
4. Coleman EA, Berenson RA. Lost in transition: challenges and opportunities for improving the quality of transitional care. *Ann Intern Med* 2004;**141**(7):533-6.
5. Patterson ES, Roth EM, Woods DD, et al. Handoff strategies in settings with high consequences for failure: lessons for health care operations. *Int J Qual Health Care* 2004;**16**(2):125-32.
6. Solet DJ, Norvell JM, Rutan GH, et al. Lost in translation: challenges and opportunities in physician-to-physician communication during patient handoffs. *Acad Med* 2005;**80**(12):1094-9.
7. Arora V, Johnson J, Lovinger D, et al. Communication failures in patient sign-out and suggestions for improvement: a critical incident analysis. *Qual Saf Health Care* 2005;**14**(6):401-7.
8. The Joint Commission of Accreditation of Healthcare Organizations. National Patient Safety Goals. [http://www.jointcommission.org/standards\\_information/npsgs.aspx](http://www.jointcommission.org/standards_information/npsgs.aspx). Accessed February 28, 2012.
9. Intitute of Health Improvement. IHI Improvement Map: Patient Transitions & Handoffs. <http://app.ihl.org/imap/tool/#Process=21e273fb-81fc-4dd2-b89b-883c10afc4bc>. Accessed February 28, 2012.
10. Apker J, Mallak LA, Gibson SC. Communicating in the "gray zone": perceptions about emergency physician hospitalist handoffs and patient safety. *Acad Emerg Med* 2007;**14**(10):884-94.
11. Shojania KG, Fletcher KE, Saint S. Graduate medical education and patient safety: a busy--and occasionally hazardous--intersection. *Ann Intern Med* 2006;**145**(8):592-8.
12. Riesenber LA, Leitzsch J, Massucci JL, et al. Residents' and attending physicians' handoffs: a systematic review of the literature. *Acad Med* 2009;**84**(12):1775-87.
13. Andrews C, Millar S. Don't fumble the handoff. Inpatient providers, specialists, and the primary care physician: a medical care delivery system with benefits and complex risks. *J Med Assoc Ga* 2007;**96**(3):23-4.

- 1  
2  
3 387 14. Gandhi TK. Fumbled handoffs: one dropped ball after another. *Ann Intern Med* 2005;**142**(5):352-  
4 388 8.  
5 389  
6  
7 390 15. Horwitz LI, Moin T, Krumholz HM, et al. Consequences of inadequate sign-out for patient care.  
8 391 *Arch Intern Med* 2008;**168**(16):1755-60.  
9 392  
10 393 16. Horwitz LI, Moin T, Krumholz HM, et al. What are covering doctors told about their patients?  
11 394 Analysis of sign-out among internal medicine house staff. *Qual Saf Health Care* 2009;**18**(4):248-  
12 395 55.  
13 396  
14 397 17. Kitch BT, Cooper JB, Zapol WM, et al. Handoffs causing patient harm: a survey of medical and  
15 398 surgical house staff. *Jt Comm J Qual Patient Saf* 2008;**34**(10):563-70.  
16 399  
17 400 18. Singh H, Thomas EJ, Petersen LA, et al. Medical errors involving trainees: a study of closed  
18 401 malpractice claims from 5 insurers. *Arch Intern Med* 2007;**167**(19):2030-6.  
19 402  
20 403 19. Sutcliffe KM, Lewton E, Rosenthal MM. Communication failures: an insidious contributor to  
21 404 medical mishaps. *Acad Med* 2004;**79**(2):186-94.  
22 405  
23 406 20. Brennan TA, Leape LL, Laird NM, et al. Incidence of adverse events and negligence in hospitalized  
24 407 patients. *N Engl J Med* 1991;**324**:370-6.  
25 408  
26 409 21. Wilson RM, Runciman WB, Gibberd RW, et al. The quality in Australian health care study. *Med J*  
27 410 *Aust* 1995;**163**(9):458-71.  
28 411  
29 412 22. Joint Commission on Accreditation of Healthcare Organizations. Using medication reconciliation  
30 413 to prevent errors. *Sentinel Event Alert* 2006;(35):1-4.  
31 414  
32 415 23. Fletcher KE, Saint S, Mangrulkar RS. Balancing continuity of care with residents' limited work  
33 416 hours: defining the implications. *Acad Med* 2005;**80**(1):39-43.  
34 417  
35 418 24. Landucci D, Gipe BT. The art and science of the handoff: how hospitalists share data. *Hospitalist*  
36 419 1999;**3**(1):4.  
37 420  
38 421 25. Horwitz LI, Meredith T, Schuur JD, et al. Dropping the baton: a qualitative analysis of failures  
39 422 during the transition from emergency department to inpatient care. *Ann Emerg Med*  
40 423 2009;**53**(6):701-10, e4.  
41 424  
42 425 26. Cullen DJ, Sweitzer BJ, Bates DW, et al. Preventable adverse drug events in hospitalized patients:  
43 426 a comparative study of intensive care and general care units. *Crit Care Med* 1997;**25**(8):1289-97.  
44 427  
45 428 27. Voigt LP, Pastores SM, Raoof ND, et al: Review of a large clinical series: intrahospital transport of  
46 429 critically ill patients: outcomes, timing, and patterns. *J Intensive Care Med* 2009;**24**(2):108-15.  
47 430  
48 431 28. Watts R, Pierson J, Gardner H. Coordination of the discharge process planning in critical care. *J*  
49 432 *Clin Nurs* 2005;**21**:39-46.  
50 433  
51  
52  
53  
54  
55  
56  
57  
58  
59  
60

- 1  
2  
3 434 29. Rosenberg AL, Watts C. Patients readmitted to ICUs\* : a systematic review of risk factors and  
4 435 outcomes. *Chest* 2000;**118**(2):492-502.  
5 436  
6  
7 437 30. Li P, Stelfox HT, Ghali WA. A prospective observational study of physician handoff for intensive-  
8 438 care-unit-to-ward patient transfers. *Am J Med* 2011;**124**(9):860-7.  
9 439  
10 440 31. Leeb K, Jokovic A, Sandhu M, et al. CIHI survey: intensive care in Canada. *Healthc Q* 2006;**9**(1):32-  
11 441 3.  
12 442  
13 443 32. Russell S. Reducing readmissions to the intensive care unit. *Heart Lung* 1999;**28**(5):365-72.  
14 444  
15 445 33. College of Intensive Care Medicine. Minimum Standards for Intensive Care Units.  
16 446 [http://www.cicm.org.au/cmsfiles/IC-](http://www.cicm.org.au/cmsfiles/IC-01%20Minimum%20Standards%20For%20Intensive%20Care%20Units%20-%20Current%20September%202011.pdf)  
17 447 [01%20Minimum%20Standards%20For%20Intensive%20Care%20Units%20-](http://www.cicm.org.au/cmsfiles/IC-01%20Minimum%20Standards%20For%20Intensive%20Care%20Units%20-%20Current%20September%202011.pdf)  
18 448 [%20Current%20September%202011.pdf](http://www.cicm.org.au/cmsfiles/IC-01%20Minimum%20Standards%20For%20Intensive%20Care%20Units%20-%20Current%20September%202011.pdf). Accessed February 28, 2012.  
19 449  
20 450 34. Dutton RP, Cooper C, Jones A, et al. Daily multidisciplinary rounds shorten length of stay for  
21 451 trauma patients. *J Trauma* 2003;**55**(5):913-9.  
22 452  
23 453 35. Vazirani S, Hays RD, Shapiro MF, et al. Effect of a multidisciplinary intervention on  
24 454 communication and collaboration among physicians and nurses. *Am J Crit Care* 2005;**14**(1):71-7.  
25 455  
26 456 36. Society for Critical Care Medicine. Practicing CCM.  
27 457 [http://www.sccm.org/AboutSCCM/Public%20Relations/Media\\_Kit/Pages/Practicing\\_CCM.aspx](http://www.sccm.org/AboutSCCM/Public%20Relations/Media_Kit/Pages/Practicing_CCM.aspx).  
28 458 Accessed March 23, 2012.  
29 459  
30 460 37. Ward NS, Read R, Afessa B, et al. Perceived effects of attending physician workload in academic  
31 461 medical intensive care units: a national survey of training program directors. *Crit Care Med*  
32 462 2012;**40**(2):400-5.  
33 463  
34 464 38. Aiken LH, Clarke SP, Sloane DM, et al. Hospital nurse staffing and patient mortality, nurse  
35 465 burnout, and job dissatisfaction. *JAMA* 2002;**288**(16):1987-93.  
36 466  
37 467 39. Goddard AF, Hodgson H, Newbery N. Impact of EWTD on patient:doctor ratios and working  
38 468 practices for junior doctors in England and Wales 2009. *Clin Med* 2010;**10**(4):330-5.  
39 469  
40 470 40. Lin F, Chaboyer W, Wallis M. A literature review of organizational, individual, and teamwork  
41 471 factors contributing to the ICU discharge process. *Aust Crit Care* 2009;**22**:29-43.  
42 472  
43 473 41. Gustad LT, Chaboyer W, Wallis M: ICU patient's transfer anxiety: a prospective cohort study.  
44 474 *Aust Crit Care* 2008;**21**(4):181-9.  
45 475  
46 476 42. Mitchell ML, Courtney M: Reducing family members' anxiety and uncertainty in illness around  
47 477 transfer from intensive care: an intervention study. *Intensive Crit Care Nurs* 2004;**20**(4):223-31.  
48 478  
49 479 43. Forseberg A, Lindgren E, Engström Å: Being transferred from an intensive care unit to a ward:  
50 480 searching for the known in the unknown. *Int J Nurs Pract* 2011;**17**:110-6.  
51 481  
52  
53  
54  
55  
56  
57  
58  
59  
60

- 1  
2  
3 482 44. Strahan EH, Brown RJ: A qualitative study of the experiences of patients following transfer from  
4 483 intensive care. *Intensive Crit Care Nurs* 2005;**21**(3):160-71.  
5 484  
6  
7 485 45. Kripalani S, Jackson AT, Schnipper JL, et al. Promoting effective transitions of care at hospital  
8 486 discharge: a review of key issues for hospitalists. *J Hosp Med* 2007;**2**(5):314-23.  
9 487  
10 488 46. Heidegger C, Treggiari M, Romand J, et al. A nationwide survey of intensive care discharge  
11 489 practice. *Intensive Care Med* 2005;**31**:1676-82.  
12 490  
13 491 47. Kripalani S, LeFevre F, Phillips C, et al. Deficits in Communication and Information Transfer  
14 492 Between Hospital-Based and Primary Care Physicians. *JAMA* 2006;**297**(8):831-41.  
15 493  
16 494 48. Watts R, Pierson J, Gardner H. How do critical care nurses define the discharge process.  
17 495 *Intensive Crit Care Nurs* 2004;**21**:39-46.  
18 496  
19 497 49. Levin P, Worner T, Sviridov S, et al. Intensive care outflow limitation -- frequency, etiology, and  
20 498 impact. *J Crit Care* 2003;**18**(4):206-11.  
21 499  
22 500 50. Wachter RM. Making healthcare safer: a critical analysis of patient safety practices. In: Evidence  
23 501 Report No 43. Edited by Agency for Healthcare Quality Research, AHRQ publication 01-E058  
24 502 edn: Rockville, Md; 2001.  
25 503  
26 504 51. The Joint Commission of Accreditation of Healthcare Organizations. Critical Access Hospital:  
27 505 2012 National Patient Safety Goals.  
28 506 [http://www.jointcommission.org/assets/1/6/NPSG\\_Chapter\\_Jan2012\\_CAH.pdf](http://www.jointcommission.org/assets/1/6/NPSG_Chapter_Jan2012_CAH.pdf). Accessed March  
29 507 11, 2012.  
30 508  
31 509 52. The National Quality Forum. Safe Practices for Better Healthcare: A Consensus Report.  
32 510 <http://www.ahrq.gov/qual/nqfpract.pdf>. Accessed March 12, 2012.  
33 511  
34 512 53. Berwick DM, Calkins DR, McCannon CJ, et al. The 100,000 lives campaign: setting a goal and a  
35 513 deadline for improving health care quality. *JAMA* 2006;**295**(3):324-7.  
36 514  
37 515 54. Boutilier S. Leaving critical care: facilitating a smooth transition. *Dimens Crit Care Nurs*  
38 516 2007;**24**(4):137-42.  
39 517  
40 518 55. Wunsch H, Angus DC, Harrison DA, et al. Variation in critical care services across North America  
41 519 and Western Europe. *Crit Care Med* 2008;**36**(10):2787-93e2781-2789.  
42 520  
43 521 56. Donabedian A. The Definition of Quality and Approaches to Its Assessment. Ann Arbor, Michigan:  
44 522 Health Administration Press 1980.  
45 523  
46 524 57. Donabedian A. Evaluating the quality of medical care. *Milbank Q* 2005;**83**(4):691-729.  
47 525  
48 526 58. Stelfox HT, Bobranska-Artiuch B, Nathens A, et al. Quality indicators for evaluating trauma care:  
49 527 a scoping review. *Arch Surg* 2010;**145**(3):286-95.  
50 528  
51  
52  
53  
54  
55  
56  
57  
58  
59  
60

- 1  
2  
3 529 59. Stelfox HT, Bobranska-Artiuch B, Nathens A, et al. A systematic review of quality indicators for  
4 530 evaluating pediatric trauma care. *Criti Care Med* 2010;**38**(4):1187-96.  
5 531  
6  
7 532 60. Stelfox HT, Nathens AB, Straus SE, et al. Assessing care of patients with major traumatic injuries  
8 533 (Funding Reference #200803PH E-188220-PH M-CBBA-587 44). University of Calgary: Canadian  
9 534 Institutes of Health Research; 2008-10-01 to 2011-09-30.  
10 535  
11 536 61. Stelfox HT, Straus SE, Flemons WW, et al. Quality indicators in trauma care (Funding Reference  
12 537 #KRS-91770). University of Calgary: Canadian Institutes of Health Research; 2008-10-01 to 2009-  
13 538 09-30.  
14 539  
15 540 62. Arksey H, O'Malley L. Scoping studies: towards a methodological framework. *Int J Soc Res*  
16 541 *Methodol* 2005;**8**:19-32.  
17 542  
18 543 63. Levac D, Colquhoun H, O'Brien KK. Scoping studies: advancing the methodology. *Implement Sci*  
19 544 2010;**5**:69.  
20 545  
21 546 64. Agency for Healthcare Research and Quality. AHRQ tools and resources for better health care.  
22 547 *Research in Action, Issue 10* [<http://www.ahrq.gov/qual/tools/toolsria.htm#assessment>].  
23 548 Accessed March 7, 2012.  
24 549  
25 550 65. EndNote X5. In. New York, NY: Thomson Reuter 2012.  
26 551  
27 552 66. Landis JR, Koch GG. The measurement of observer agreement for categorical data. *Biometrics*  
28 553 1977;**33**(1):159-74.  
29 554  
30 555 67. Caldwell K, Henshaw L, Taylor G. Developing a framework for critiquing health research: An early  
31 556 evaluation. *Nurs Educ Today* 2011;**31**(8):e1-7.  
32 557  
33 558 68. McGlynn EA. Selecting common measures of quality and system performance. *Med Care*  
34 559 2003;**41**(Suppl 1):I39-47.  
35 560  
36 561 69. Fan E, Laupacis A, Pronovost PJ, et al. How to use an article about quality improvement. *JAMA*  
37 562 2010;**304**(20):2279-87.  
38 563  
39 564 70. Strauss A, Corbin J. Basics of Qualitative Research: Techniques and Procedures for Developing  
40 565 Grounded Theory, 2nd edn. Thousand Oaks, CA: Sage Publication 1998.  
41 566  
42 567 71. Hoyt DB, Hollingsworth-Fridlund P, Fortlage D, et al. An evaluation of provider-related and  
43 568 disease-related morbidity in a level I university trauma service: directions for quality  
44 569 improvement. *J Trauma* 1992;**33**(4):586-601.  
45 570  
46 571 72. Davis JW, Hoyt DB, McArdle MS, et al. The significance of critical care errors in causing  
47 572 preventable death in trauma patients in a trauma system. *J Trauma* 1991;**31**(6):813-8;  
48 573 discussion 818-9.  
49 574  
50 575  
51  
52  
53  
54  
55  
56  
57  
58  
59  
60



1  
2  
3 576 **List of Abbreviations**  
4

5 577 Intensive Care Unit, ICU  
6

7  
8 578 Institute of Medicine, IOM  
9

10 579  
11

12  
13 580 **Authors' Contributions**  
14

15 581 Study concept: Stelfox, Perrier, Straus, Ghali, Zygun, Boiteau, Zuege  
16

17 582 Study design: Stelfox, Perrier, Straus, Ghali, Zygun, Boiteau, Zuege  
18

19  
20 583 Obtained funding: Stelfox, Perrier, Straus, Ghali, Zygun, Boiteau, Zuege  
21

22 584 Drafted protocol: Stelfox  
23

24 585 Edited protocol: Stelfox, Perrier, Straus, Ghali, Zygun, Boiteau, Zuege  
25

26  
27 586 All authors read and approved the final protocol.  
28

29 587  
30

31  
32 588 **Competing Interests**  
33

34 589 The authors declare they have no competing interests.  
35

36 590  
37

38  
39 591 **Acknowledgements**  
40

41 592 The project is supported by a Synthesis Grant (KRS124604) from the Canadian Institutes of  
42

43 593 Health Research. Dr. Stelfox is supported by a New Investigator Award from the Canadian  
44

45 594 Institutes of Health Research and a Population Health Investigator Award from Alberta  
46

47 595 Innovates Health Solutions. Dr Straus is funded by a Tier 1 Canada Research Chair. Dr Ghali is  
48

49 596 funded by a Senior Health Scholar Award from Alberta Innovates Health Solutions. Dr. Zygun is  
50

51 597 supported by a Clinical Investigator Award from Alberta Innovates. Funding sources had no role  
52  
53  
54  
55  
56  
57  
58  
59  
60

1  
2  
3  
4  
5  
6  
7  
8  
9  
10  
11  
12  
13  
14  
15  
16  
17  
18  
19  
20  
21  
22  
23  
24  
25  
26  
27  
28  
29  
30  
31  
32  
33  
34  
35  
36  
37  
38  
39  
40  
41  
42  
43  
44  
45  
46  
47  
48  
49  
50  
51  
52  
53  
54  
55  
56  
57  
58  
59  
60

598 in the design of the protocol and we are unaware of any conflicts of interest. We thank Stephanie  
599 Todd and Jamie Boyd for helping format our manuscript.  
600

For peer review only

601 **Table 1. Conceptual model of ICU discharge\***

| <b>IOM Aims</b>         | <b>Structure (Discharge Tool)</b> | <b>Process</b>        | <b>Outcome</b>         |
|-------------------------|-----------------------------------|-----------------------|------------------------|
| <b>Safe</b>             | Risk stratification               | Patient to right ward | ↓ ICU readmission      |
| <b>Effective</b>        | Medication reconciliation         | Right medications     | ↓ adverse event        |
| <b>Efficient</b>        | Information for providers         | Providers informed    | ↓ duplication of tests |
| <b>Timely</b>           | Risk stratification               | Discharged when ready | ↓ length of stay       |
| <b>Patient-Centered</b> | Information for patients          | Patients engaged      | ↑ Patient satisfaction |
| <b>Equitable</b>        | Checklist                         | Equal access          | ↓ inequalities         |

602 \*Table populated with sample tool components and consequent processes and outcomes

603

For peer review only

1  
2  
3  
4  
5  
6  
7  
8  
9  
10  
11  
12  
13  
14  
15  
16  
17  
18  
19  
20  
21  
22  
23  
24  
25  
26  
27  
28  
29  
30  
31  
32  
33  
34  
35  
36  
37  
38  
39  
40  
41  
42  
43  
44  
45  
46  
47  
48  
49  
50  
51  
52  
53  
54  
55  
56  
57  
58  
59  
60

604 **Figure legends**

605 Figure 1. Conceptual evidence-based ICU discharge planning tool

606

607 **Additional Files**

608 File name: Additional File 1

609 File format: PDF

610 Title of data: Draft Search Strategy for Medline

611 Description of data: literature search strategy

612

For peer review only

## Identifying Intensive Care Unit Discharge Planning Tools: Protocol for a Scoping Review

Henry T Stelfox, MD, PhD, FRCPC<sup>1-4</sup> (tstelfox@ucalgary.ca)

Laure Perrier, MEd, MLIS<sup>5,6</sup> (l.perrier@utoronto.ca)

Sharon E Straus, MD, MSc, FRCPC<sup>7</sup> (sharon.straus@utoronto.ca)

William A Ghali, MD, MPH, FRCPC<sup>2-4</sup> (wghali@ucalgary.ca)

David Zygun, MD, MSc, FRCPC<sup>8,9</sup> (zygun@ualberta.ca)

Paul Boiteau, MD, FRCPC<sup>1</sup> (paul.boiteau@albertahealthservices.ca)

Danny J Zuege, MD, MSc, FRCPC<sup>1,2</sup> (dan.zuege@albertahealthservices.ca)

### Affiliations:

1. Department of Critical Care Medicine, University of Calgary and Alberta Health Services – Calgary Zone

2. Department of Medicine, University of Calgary and Alberta Health Services – Calgary Zone

3. Department of Community Health Sciences, University of Calgary

4. Institute for Public Health, University of Calgary

5. Li Ka Shing Knowledge Institute, Saint Michael's Hospital

6. Continuing Education & Professional Development, Faculty of Medicine, University of Toronto

7. Saint Michael's Hospital, Department of Medicine, University of Toronto

8. Division of Critical Care, University of Alberta

9. Department of Critical Care Medicine, Alberta Health Services – Edmonton Zone

Keywords: Scoping review, continuity of care, transitions of care, intensive care unit, discharge.

Word Count: 3,438

Correspondence: Henry Thomas Stelfox

Teaching Research & Wellness Building, University of Calgary

3280 Hospital Drive NW, Calgary, AB, Canada, T2N 4Z6

Tel: (403) 944-2334, Fax: (403) 283-9994

March 7, 2013

**ABSTRACT**

**Background:** Transitions of care between providers are vulnerable periods in health care delivery that expose patients to preventable errors and adverse events. Patient discharge from the intensive care unit (ICU) to a medical or surgical hospital ward is one of the most challenging and high risk transitions of care. Approximately one in twelve patients discharged will be readmitted to ICU or die before leaving hospital. Many more patients are exposed to unnecessary health care, adverse events and/or are disappointed with the quality of their care. Our objective is to conduct a scoping review by systematically searching the literature to identify ICU discharge planning tools and their supporting evidence-base including barriers and facilitators to their use.

**Methods and analysis:** Systematic searching of the published health literature will be conducted to identify existing ICU discharge planning tools and supporting evidence. Literature (research and non-research) reporting on tools used to facilitate decision making and/or communication at ICU discharge, with patients of any age will be included. Outcomes will include adverse events and provider and patient/family reported outcomes. Two investigators will independently review the abstracts (Screen 1) to identify those meeting inclusion criteria and then independently assess the full text articles (Screen 2) to determine if they meet inclusion criteria. Data collection will include information on citations and identified tools. A quality assessment will be performed on original research studies. A descriptive summary will be developed for each tool.

**Ethics and dissemination:** Our scoping review will synthesize the literature for ICU discharge planning tools and identify opportunities for knowledge to action and gaps in evidence where primary evidence is necessary. This will serve as the foundational element in a multi-step

1  
2  
3 55 research program to standardize and improve the quality of care provided to patients during ICU  
4  
5  
6 56 discharge. Ethics approval is not required for this study.  
7  
8  
9 57  
10  
11  
12  
13  
14  
15  
16  
17  
18  
19  
20  
21  
22  
23  
24  
25  
26  
27  
28  
29  
30  
31  
32  
33  
34  
35  
36  
37  
38  
39  
40  
41  
42  
43  
44  
45  
46  
47  
48  
49  
50  
51  
52  
53  
54  
55  
56  
57  
58  
59  
60

For peer review only

## 58 BACKGROUND

59 The transfer of responsibility for patient care (synonyms include transition of care, handoff, sign  
60 over etc.) is a common practice in acute-care hospitals.[1] During transfers of patient care,  
61 crucial information on patient conditions, tests undertaken, and treatments received is transferred  
62 between providers, so that care plans can be effectively continued by receiving providers. A  
63 handoff between health care providers is not only a process to provide accurate and vital  
64 information regarding a patients' care, but is also a transfer of accountability and responsibility  
65 for patient care.[2-7] Healthcare organizations recognize the importance of transitions of care  
66 and have proposed organizational practices to improve the effectiveness and coordination of  
67 communication among providers and recipients of care across the care continuum.[3, 8, 9]

68  
69 Unfortunately, the practice of provider handoff is often suboptimal due to communication  
70 barriers[6, 10-12] and is a major contributor to medical errors and adverse events.[2, 7, 13-19]  
71 The Harvard Medical Practice Study[20] found that adverse events occur in approximately 4% of  
72 patients discharged from hospital, with three quarters of these adverse events resulting in patient  
73 disability (ranging from less than one month duration to permanent) . A similar Australian study  
74 reported adverse events resulting in disability or increased length of stay for 17% of patients  
75 admitted to hospital.[21] In 2006, the Joint Commission for Accreditation of Health Care  
76 Organization (JCAHO) reported that 63% of deaths related to medical error in its sentinel events  
77 database involved a breakdown in communication.[22] Most research on handoffs for in-hospital  
78 patient transfers has focused on patient transfers from the perspective of a single discipline, such  
79 as physician end-of-shift[1, 6, 11, 18, 23] or end-of-service[2, 16, 17, 24] handoffs. In contrast,  
80 relatively little is known about handoffs between non-physician providers.[10, 25]



1  
2  
3 81 Multidisciplinary handoffs though are required to optimally transition care and likely face  
4  
5 82 relatively greater communication hurdles due to cultural differences, work load challenges, and  
6  
7 83 differences in clinical focus between specialties and disciplines, and thus may lead to greater  
8  
9  
10 84 potential for medical errors and adverse events.[10, 12, 25]  
11  
12  
13 85

14  
15 86 Numerous types of patient transfers and provider handoffs occur every day.[4, 6] A transition of  
16  
17 87 care occurs each time a patient is referred to a specialist by their family doctor, assigned a new  
18  
19 88 nurse during hospital shift change or discharged from hospital. Among these, patient transfers  
20  
21 89 from the Intensive Care Unit (ICU) to a medical or surgical hospital ward are likely of  
22  
23 90 particularly high risk due to the number, complexity and acuity of the medical conditions that  
24  
25 91 characterize this patient group;[26-29] the large “voltage” drop in available resources when  
26  
27 92 patients move from the ICU, where medical care is intensive and resources are rich, to ward  
28  
29 93 environments, where patients typically receive much less intensive monitoring and patient  
30  
31 94 care;[26] the multitude of communication barriers that providers often face during inter-specialty  
32  
33 95 and multidisciplinary handoffs;[30] the lack of standardization in patient transfer processes  
34  
35 96 overall; and in particular the lack of standardized written and/or electronic tools to facilitate an  
36  
37 97 optimal transfer process.[28]  
38  
39  
40  
41  
42  
43  
44  
45

46 99 Patients admitted to the ICU are of the highest acuity requiring management with life support  
47  
48 100 technologies and aggressive interventions to sustain life and progress towards a clinically  
49  
50 101 stabilized condition.[28] Approximately one in ten patients admitted to an acute care facility are  
51  
52 102 admitted to an ICU.[31] Transition of care is extremely common with 90% of ICU patients being  
53  
54 103 eventually discharged to medical or surgical hospital wards.[32] With millions of  
55  
56  
57  
58  
59  
60

1  
2  
3 104 hospitalizations in acute care facilities in most countries each year,[31] hundreds of thousands of  
4  
5 105 patients will be admitted to ICU and experience challenging and high risk transfers to hospital  
6  
7  
8 106 wards.  
9

10  
11 107  
12  
13 108 ICU discharge represents a large drop in the intensity of care with patients transitioning from a  
14  
15 109 high acuity unit to a general care unit. ICUs are specially staffed, self-contained hospital units,  
16  
17 110 dedicated to the management and continuous monitoring of patients with life-threatening  
18  
19  
20 111 illnesses.[33] The medical support available to patients in the ICU includes multidisciplinary  
21  
22 112 teams of healthcare providers (i.e. physicians, nurses, pharmacists, therapists) that typically see  
23  
24 113 each patient multiple times a day.[34, 35] In general there is a nurse for every one or two patients  
25  
26  
27 114 and a physician for every eight to ten patients.[36, 37] In contrast, general medical and surgical  
28  
29 115 care units have fewer resources with a nurse for every four to eight patients[38] and physicians  
30  
31 116 responsible for up to as many as 65 patients during regular working hours and 400 patients  
32  
33  
34 117 outside of regular working hours.[39] Other health care providers are often less available.  
35

36  
37 118  
38  
39 119 When a patient is transferred from ICU to a general care unit typically there is a complete  
40  
41 120 transition in healthcare providers, most patients being assigned new teams of physicians, nurses,  
42  
43 121 pharmacists, therapists etc. However, communication between providers discharging patients  
44  
45  
46 122 from the ICU and providers admitting these patients to general care units has been documented  
47  
48 123 to be infrequent, incomplete and of poor quality.[30, 40] An observational study done by our  
49  
50 124 research team in preparation for this protocol found direct verbal communication between ICU  
51  
52  
53 125 discharging physicians and ward admitting physicians to occur in only 15-25% of the ICU  
54  
55 126 discharges.[30] Optimal transfers of care require effective communication between discharging  
56  
57  
58  
59  
60

1  
2  
3 127 and admitting physicians that includes direct communication (in person or via telephone);  
4  
5  
6 128 concise, accurate, up-to-date discharge summaries; and physician notification at the time of  
7  
8 129 transfer.[3, 30] However, communication during transfer is challenged by provider workloads,  
9  
10  
11 130 available resources, and variations in clinical focus between specialties.[10, 12, 25]  
12  
13 131

14  
15 132 Communication between physicians and patients/families at the time of ICU discharge is also  
16  
17 133 frequently suboptimal with the same local observational study finding 68% of patient/families  
18  
19 134 reporting a desire for increased opportunities to ask questions about the transfer.[30] This lack of  
20  
21 135 information about the ICU transfer process appears to be associated with patient and family  
22  
23 136 anxiety.[41-44] Effective communication between providers and patients/families to provide  
24  
25 137 early notification of an upcoming transfer,[30] and present information on current medical  
26  
27 138 conditions and future plans prior to transfer would likely better manage expectations and reduce  
28  
29 139 anxiety.  
30  
31  
32  
33

34 140  
35  
36 141 Standardizing the process of patient discharge from ICU could improve the safety, quality and  
37  
38 142 efficiency of care. Multiple interventions to improve ICU discharge have been developed (e.g.  
39  
40 143 transitional care units, ICU outreach, nursing liaison, etc.),[28, 45-48] but there is no consensus  
41  
42 144 on an ideal ICU discharge model to optimize the quality of patient care[28] and few  
43  
44 145 organizations have implemented standardized guidelines or procedures for transitions of  
45  
46 146 care.[46, 49] Government agencies,[50] specialty groups[3, 51, 52] and the Institute for  
47  
48 147 Healthcare Improvement[53] have all advocated standardizing ICU discharge structure and  
49  
50 148 processes to improve continuity of care, patient safety, patient and provider satisfaction, and  
51  
52 149 resource use.[47, 54]  
53  
54  
55  
56  
57  
58  
59  
60

1  
2  
3 150  
4  
5  
6 151 The challenges of ICU discharge are well recognized.[28, 55] Very little is known about the  
7  
8 152 quality of patient care during ICU discharge. A comprehensive review of ICU discharge  
9  
10 153 planning tools has not been previously completed. The scope and magnitude of tools to facilitate  
11  
12 154 patient discharge from ICU has not previously been defined. For tools already developed, it is  
13  
14 155 unclear how effectively these have been implemented and how they may have affected patient  
15  
16 156 clinical outcomes and/or patient and family satisfaction with care. In response to these  
17  
18 157 challenges, we will conduct a scoping review to identify ICU discharge planning tools and the  
19  
20 158 supporting evidence base for these tools including barriers and facilitators to their use.  
21  
22  
23  
24  
25 159

## 26 27 160 **METHODS AND ANALYSIS**

### 28 29 161 **Conceptual model**

30  
31 162 Our scoping review will adopt the model of system theory first introduced in 1966 by Avedis  
32  
33 163 Donabedian.[56, 57] In Donabedian's framework, the three components of healthcare quality are  
34  
35 164 *structure, process* and *outcome*. The *structure* is the environment in which health care is  
36  
37 165 provided and includes material and health resources, operational factors, and organizational  
38  
39 166 characteristics of the healthcare facility. The *process* is the method by which healthcare is  
40  
41 167 provided and includes the giving and receiving of care by the providers and healthcare system.  
42  
43 168 The *outcome* is the consequence of healthcare and includes the health status of patients. We will  
44  
45 169 examine *structural* devices (tools) used to facilitate ICU discharge and evaluate their association  
46  
47 170 with *processes* and *outcomes* of care for patients discharged from ICU (Figure 1).  
48  
49  
50  
51  
52

53 171  
54  
55  
56  
57  
58  
59  
60

1  
2  
3 172 In addition, we will incorporate the Institute of Medicine's (IOM) six aims for the 21<sup>st</sup> Century  
4  
5  
6 173 Health Care System into our research. ICU discharge tools should foster safe, effective, efficient,  
7  
8 174 timely, equitable, and patient-centered discharge from ICU. We have developed a conceptual  
9  
10 175 model for our scoping review that merges the Donabedian model and the IOM's six aims (Table  
11  
12 176 1). We recognize that our conceptual model is a relatively basic and simple representation of  
13  
14  
15 177 ICU discharge, but no other simple validated framework exists and we have successfully used a  
16  
17 178 variation of this model to develop quality indicators for injury care.[58-61]  
18  
19  
20 179

## 21 22 180 **Objectives**

23  
24 181 This is a protocol for a scoping review to identify ICU discharge planning tools and the  
25  
26  
27 182 supporting evidence base for these tools including barriers and facilitators to their use. Methods  
28  
29 183 for inclusion and analysis of articles and reporting of their results will be performed as  
30  
31 184 recommended by Arksey and O'Malley[62] and refined by Levac and colleagues.[63]  
32  
33  
34 185

35  
36 186 We define an ICU as a distinct hospital ward that is staffed by specialized healthcare  
37  
38 187 professionals and where immediate and continuous life sustaining treatment (e.g. invasive  
39  
40 188 monitoring, vasoactive medications, invasive mechanical ventilation) is administered to  
41  
42 189 hospitalized patients suffering from life-threatening conditions (e.g. severe respiratory  
43  
44 190 failure).[36] Patient discharge from ICU is defined as the transfer of accountability and  
45  
46 191 responsibility for patient care from the ICU to a hospital ward. Tools are defined as structural  
47  
48 192 devices (e.g. protocols, reminders, order sets, bundles, checklists, forms, decision-aids) designed  
49  
50 193 to aid health care providers or patients/families with decision making and/or communication.[64]  
51  
52  
53  
54  
55 194

1  
2  
3 195 The specific objectives of the scoping review are:  
4

- 5  
6 196 1. To complete a systematic search of the literature to identify existing ICU discharge planning  
7  
8 197 tools and evaluate the evidence base in support of the tools (including impact on patient  
9  
10 198 outcomes).  
11  
12 199 2. To map the ICU discharge tools and supporting evidence to our conceptual framework to  
13  
14 200 identify gaps in the evidence where primary evidence or systematic reviews are required.  
15  
16 201 3. To evaluate the tools according to their relevance to knowledge users (importance, feasibility,  
17  
18 202 usability, scientific acceptability).  
19  
20 203 4. To describe barriers and facilitators to implementation and utilization of ICU discharge  
21  
22 204 planning tools.  
23  
24  
25  
26  
27  
28

## 29 206 **Eligibility Criteria**

30  
31 207 Research studies (no methodological restrictions – case series, cohort, cross-sectional,  
32  
33 208 nonrandomized controlled, consensus method, case-control, randomized controlled) and non-  
34  
35 209 research study designs (editorial, guideline, letter to the editor, narrative review) are eligible. We  
36  
37 210 will include studies with all human patients discharged from any ICU regardless of subspecialty  
38  
39 211 (e.g. medical, neuroscience, etc.). There is no restriction on age as tools identified for neonatal  
40  
41 212 and pediatric patients may provide relevant information for the discharge of adult patients (and  
42  
43 213 vice versa).  
44  
45  
46  
47  
48  
49

50  
51 215 Eligible studies must include an electronic or paper tool (including guidelines, protocols,  
52  
53 216 questionnaires, checklist, etc.) intended to facilitate discharge from ICU (regardless of discharge  
54  
55 217 destination) either by providing decision-support for healthcare providers and/or  
56  
57  
58  
59  
60

1  
2  
3 218 patients/families to determine readiness for discharge or aid in guiding the process of patient  
4  
5  
6 219 discharge. A comparison group is not required as we will be looking for studies that describe the  
7  
8 220 development, implementation or evaluation of a tool. If evaluation studies are identified, details  
9  
10 221 on the comparison group will be assessed including patients, type of ICU (e.g. medical,  
11  
12 222 neuroscience etc.) and discharge destination (e.g. high dependency step down unit, hospital ward  
13  
14 223 etc.). Outcome measures will include (1) any severe adverse events post-ICU discharge (e.g. ICU  
15  
16 224 readmission, hospital mortality), (2) any provider reported outcomes (e.g. quality of  
17  
18 225 communication, satisfaction), or (3) any patient/family reported outcomes (e.g. quality of  
19  
20 226 information, engagement, satisfaction).  
21  
22  
23  
24  
25 227  
26  
27 228 Studies will be excluded if they include patient discharges predominantly from coronary care  
28  
29 229 units, high dependency units, and step-down units.  
30  
31  
32 230

### 33 34 231 **Search Strategy**

35  
36 232 We will search the following electronic databases: Medline (OVID interface, 1946 onwards),  
37  
38 233 EMBASE (OVID interface, 1947 onwards), CINAHL (EBSCO interface, 1981 onwards) and the  
39  
40 234 Cochrane Library (current issue). Bibliographies of retrieved articles will be searched for  
41  
42 235 additional relevant articles. We will also search conference proceedings from the past five years,  
43  
44 236 including the Canadian Critical Care Conference, Society of Critical Care Medicine, Australian  
45  
46 237 and New Zealand Intensive Care Society Conference, European Society of Intensive Care  
47  
48 238 Medicine Conference, American Thoracic Society Conference, and International Symposium on  
49  
50 239 Intensive Care and Emergency Medicine. Experts in the field, identified from the references of  
51  
52 240 included studies, will be contacted to determine whether they are aware of any additional studies.  
53  
54  
55  
56  
57  
58  
59  
60

1  
2  
3 241  
4  
5  
6 242 An experienced information specialist (LP) will conduct the literature searches. They will be  
7  
8 243 performed with no year or language restrictions and will use combinations and synonyms of the  
9  
10 244 following search terms: intensive care, critical care, discharge plan, patient transfer and patient  
11  
12 245 discharge. Appropriate wildcards will be used to account for plurals and variations in spelling. A  
13  
14  
15 246 draft literature search is available in Additional File 1.  
16  
17  
18 247

### 20 248 **Study selection process**

21  
22 249 Two investigators will independently review the retrieved abstracts (Screen 1) to identify those  
23  
24 250 that meet the inclusion criteria. The full text of those articles deemed relevant by either reviewer  
25  
26  
27 251 will be obtained. Two investigators will independently assess the full text articles (Screen 2) to  
28  
29 252 determine if they meet the inclusion criteria. Two investigators will discuss disagreements on  
30  
31  
32 253 inclusion and a third investigator will resolve disagreements if needed. Bibliographic details will  
33  
34 254 be downloaded to EndNote.[65] The study selection process will be pilot tested using 50  
35  
36 255 citations from the literature search. The inclusion and exclusion criteria will be serially clarified  
37  
38  
39 256 and reviewer training sequentially revised until reliable study selection can be demonstrated  
40  
41 257 (estimated  $\kappa \geq 0.6$ ).[66]  
42  
43  
44 258

### 46 259 **Data items and data collection process**

47  
48 260 The data collection instruments will include information on both citations and identified tools.  
49  
50  
51 261 We will document the type of citation (e.g. original research), country, setting (e.g. subspecialty  
52  
53 262 of unit), study design, study population, recruitment and sampling, diagnostic criteria, reference  
54  
55 263 standard, blinding, statistical methods and outcomes. For each tool we will document the name,  
56  
57  
58  
59  
60



1  
2  
3 264 purpose (e.g. patient evaluation for discharge, planning patient discharge etc.), components  
4  
5  
6 265 (single component vs. multi-component), how it is applied (e.g. electronic) and the timing of  
7  
8 266 activation (e.g. discharge planning vs. discharge execution). If available, we will record any  
9  
10 267 measurement properties documented (sensitivity/specificity), reported impact on processes (e.g.  
11  
12 268 medication reconciliation) and outcomes (e.g. patient readmission to ICU) of care for patients,  
13  
14 269 families and providers and barriers and facilitators identified to use of the tool (e.g.  
15  
16 270 organizational culture). The data collection instrument and reviewer training will be sequentially  
17  
18 271 revised until reliable data abstraction can be demonstrated (estimated  $\kappa \geq 0.8$ ).[66] Differences in  
19  
20 272 coding between the two reviewers will be resolved by discussion and a third reviewer consulted  
21  
22 273 if an agreement cannot be reached. Original research studies will have the quality of their  
23  
24 274 methodology assessed using the framework of Caldwell et al.[67] for evaluating both  
25  
26 275 quantitative and qualitative study designs. Two clinical decision-makers (Zygun, Boiteau,  
27  
28 276 Zuege) will independently judge the relevance of each tool for decision-making according to  
29  
30 277 four dimensions derived from the Strategic Framework Board in the United States:[68] 1) targets  
31  
32 278 important improvements in continuity of patient care, 2) feasible to implement, 3) easy to use, 4)  
33  
34 279 strength of scientific evidence (using the GRADE criteria).[69]  
35  
36  
37  
38  
39  
40  
41  
42

## 281 Analysis

43  
44 282 Quantitative and qualitative analyses will be performed. The articles and tools will be  
45  
46 283 categorized according to their respective criteria. Agreement on data abstraction and article  
47  
48 284 classification will be assessed with Cohen  $\kappa$  reliability coefficients.[66] A comprehensive list of  
49  
50 285 the tools will be developed and summarized using simple numerical counts. We will present the  
51  
52 286 distribution of tools according to the cells of our conceptual model along with binomial 95%  
53  
54  
55  
56  
57  
58  
59  
60

1  
2  
3 287 confidence intervals as well as detailed tabulations by type of article (original research, non-  
4  
5  
6 288 research) and study design. We will examine the purpose and components of the tools from each  
7  
8 289 study as well as reported measurement properties (e.g. sensitivity/specificity of risk stratification  
9  
10  
11 290 tools) and reported processes (e.g. hospital length of stay) and outcomes (e.g. readmission to  
12  
13 291 ICU) of care. A descriptive summary will be developed of each tool's purpose, components,  
14  
15 292 conceptual model classification, measurement properties and relevance to knowledge users.  
16

17  
18 293

19  
20 294 Qualitative studies will be evaluated by identifying the key outcomes and themes presented by  
21  
22 295 each study (e.g. reported barriers and facilitators to discharge tool utilization), preserving the  
23  
24 296 meaning from their original source, and tabulating them within the review. Translation of key  
25  
26  
27 297 concepts from all studies will be performed to identify novel concepts not explored by individual  
28  
29 298 studies. Analysis will focus on identifying the overlap of key concepts between studies. Finally,  
30  
31 299 the translated concepts will be synthesized and refined to identify core themes.[70]  
32

33  
34 300

35  
36 301 Using the above categorization scheme, we will be able to provide a scoping review of what  
37  
38 302 research is available in the area of ICU discharge planning tools and the evidence base  
39  
40  
41 303 supporting available tools. From this we will identify where there is a need for a systematic  
42  
43 304 review of the literature (e.g. there may be sufficient literature on validated risk stratification  
44  
45 305 techniques) and where gaps in the literature exist and primary prospective studies are needed.  
46  
47

48 306

## 49 50 307 **ETHICS AND DISSEMINATION**

51  
52  
53 308 This scoping review is the first step in a major empiric work to measure and improve ICU  
54  
55 309 discharge processes (focused on adult patients). It will identify the fundamental information  
56  
57  
58  
59  
60

1  
2  
3 310 needed to implement an ICU discharge planning tool. This review will identify existing tools to  
4  
5 311 facilitate ICU discharge, the supporting evidence base as well as facilitators and barriers to  
6  
7 312 implementation. All data will be obtained from publicly available materials, and therefore this  
8  
9 313 study will not require ethics approval.  
10  
11  
12  
13 314

14  
15 315 Our knowledge translation strategy will involve, among other approaches, a workshop to be held  
16  
17 316 in conjunction with the annual January Canadian Critical Care Trials Group meeting that will  
18  
19 317 bring together key target audiences across disciplines for our research. By engaging  
20  
21 318 multidisciplinary stakeholders we will enhance linkages necessary for dissemination of our  
22  
23 319 results. We will engage stakeholders in a discussion of the results and develop and prioritize a  
24  
25 320 research agenda for implementation of a standardized ICU discharge planning tool. We will  
26  
27 321 publish in health services research and discipline-based journals. In addition, we will encourage  
28  
29 322 presentation of findings at health services research conferences at national and international  
30  
31 323 meetings including the annual meetings of the Canadian Critical Care Trials Group, and  
32  
33 324 International Symposium of Intensive Care and Emergency Medicine amongst others.  
34  
35  
36  
37  
38  
39 325

40  
41 326 Our scoping review results have the potential to influence the care of many patients. We will  
42  
43 327 synthesize the literature for ICU discharge planning tools and identify opportunities for  
44  
45 328 knowledge to action and gaps in evidence where primary evidence is necessary. ICUs are  
46  
47 329 specialized units that have been widely implemented around the world to care for the sickest  
48  
49 330 patients in the health care system.[55] Discharge from ICU is a high risk process because  
50  
51 331 vulnerable patients, move from a resource rich environment to a relatively resource poor  
52  
53 332 environment using a process that is non-standardized, inefficient and characterized by poor  
54  
55  
56  
57  
58  
59  
60

1  
2  
3 333 communication and frequent adverse events.[29, 30, 40, 45, 46, 71, 72] To improve patient care  
4  
5  
6 334 we need evidence-based tools to standardize and improve the quality of care provided to patients  
7  
8 335 during ICU discharge. Our results will help implement an evidence-based ICU discharge  
9  
10 336 planning tool to ensure that discharge from the ICU is safe, effective, efficient, timely, equitable  
11  
12 337 and patient-centered so that the *right patient* is discharged at the *right time* using a *process* that  
13  
14  
15 338 improves patient care and reduces the risk of adverse events and hospital mortality while  
16  
17 339 facilitating patients' care journeys.  
18  
19

20 340  
21  
22  
23  
24  
25  
26  
27  
28  
29  
30  
31  
32  
33  
34  
35  
36  
37  
38  
39  
40  
41  
42  
43  
44  
45  
46  
47  
48  
49  
50  
51  
52  
53  
54  
55  
56  
57  
58  
59  
60

341

## References

- 1  
2  
3  
4  
5  
6 342 1. Horwitz LI, Krumholz HM, Green ML, Huot SJ: **Transfers of patient care between house staff on**  
7 343 **internal medicine wards: a national survey.** *Archives of internal medicine* 2006, **166**(11):1173-  
8 344 1177.
- 9 345  
10 346 2. Petersen LA, Brennan TA, O'Neil AC, et al. Does housestaff discontinuity of care increase the risk  
11 347 for preventable adverse events? *Ann Intern Med* 1994;**121**(11):866-72.  
12 348
- 13 349 3. Canadian Council on Health Service Accreditation. CCHSA patient/client safety goals and  
14 350 required organizational goals: evaluation of implementation and evidence of compliance.  
15 351 Version of 2.1 for use with 2007 standard. [http://www.accreditation.ca/uploadedFiles/CHAR-](http://www.accreditation.ca/uploadedFiles/CHAR-2012-en.pdf)  
16 352 [2012-en.pdf](http://www.accreditation.ca/uploadedFiles/CHAR-2012-en.pdf). Accessed March 12, 2012.  
17 353
- 18 354 4. Coleman EA, Berenson RA. Lost in transition: challenges and opportunities for improving the  
19 355 quality of transitional care. *Ann Intern Med* 2004;**141**(7):533-6.  
20 356
- 21 357 5. Patterson ES, Roth EM, Woods DD, et al. Handoff strategies in settings with high consequences  
22 358 for failure: lessons for health care operations. *Int J Qual Health Care* 2004;**16**(2):125-32.  
23 359
- 24 360 6. Solet DJ, Norvell JM, Rutan GH, et al. Lost in translation: challenges and opportunities in  
25 361 physician-to-physician communication during patient handoffs. *Acad Med* 2005;**80**(12):1094-9.  
26 362
- 27 363 7. Arora V, Johnson J, Lovinger D, et al. Communication failures in patient sign-out and suggestions  
28 364 for improvement: a critical incident analysis. *Qual Saf Health Care* 2005;**14**(6):401-7.  
29 365
- 30 366 8. The Joint Commission of Accreditation of Healthcare Organizations. National Patient Safety  
31 367 Goals. [http://www.jointcommission.org/standards\\_information/npsgs.aspx](http://www.jointcommission.org/standards_information/npsgs.aspx). Accessed February  
32 368 28, 2012.  
33 369
- 34 370 9. Intitute of Health Improvement. IHI Improvement Map: Patient Transitions & Handoffs.  
35 371 <http://app.ihl.org/imap/tool/#Process=21e273fb-81fc-4dd2-b89b-883c10afc4bc>. Accessed  
36 372 February 28, 2012.  
37 373
- 38 374 10. Apker J, Mallak LA, Gibson SC. Communicating in the "gray zone": perceptions about emergency  
39 375 physician hospitalist handoffs and patient safety. *Acad Emerg Med* 2007;**14**(10):884-94.  
40 376
- 41 377 11. Shojania KG, Fletcher KE, Saint S. Graduate medical education and patient safety: a busy--and  
42 378 occasionally hazardous--intersection. *Ann Intern Med* 2006;**145**(8):592-8.  
43 379
- 44 380 12. Riesenber LA, Leitzsch J, Massucci JL, et al. Residents' and attending physicians' handoffs: a  
45 381 systematic review of the literature. *Acad Med* 2009;**84**(12):1775-87.  
46 382
- 47 383 13. Andrews C, Millar S. Don't fumble the handoff. Inpatient providers, specialists, and the primary  
48 384 care physician: a medical care delivery system with benefits and complex risks. *J Med Assoc Ga*  
49 385 2007;**96**(3):23-4.  
50 386  
51  
52  
53  
54  
55  
56  
57  
58  
59  
60

1  
2  
3  
4  
5  
6  
7  
8  
9  
10  
11  
12  
13  
14  
15  
16  
17  
18  
19  
20  
21  
22  
23  
24  
25  
26  
27  
28  
29  
30  
31  
32  
33  
34  
35  
36  
37  
38  
39  
40  
41  
42  
43  
44  
45  
46  
47  
48  
49  
50  
51  
52  
53  
54  
55  
56  
57  
58  
59  
60

- 387 14. Gandhi TK. Fumbled handoffs: one dropped ball after another. *Ann Intern Med* 2005;**142**(5):352-8.
- 388
- 389
- 390 15. Horwitz LI, Moin T, Krumholz HM, et al. Consequences of inadequate sign-out for patient care. *Arch Intern Med* 2008;**168**(16):1755-60.
- 391
- 392
- 393 16. Horwitz LI, Moin T, Krumholz HM, et al. What are covering doctors told about their patients? Analysis of sign-out among internal medicine house staff. *Qual Saf Health Care* 2009;**18**(4):248-55.
- 394
- 395
- 396
- 397 17. Kitch BT, Cooper JB, Zapol WM, et al. Handoffs causing patient harm: a survey of medical and surgical house staff. *Jt Comm J Qual Patient Saf* 2008;**34**(10):563-70.
- 398
- 399
- 400 18. Singh H, Thomas EJ, Petersen LA, et al. Medical errors involving trainees: a study of closed malpractice claims from 5 insurers. *Arch Intern Med* 2007;**167**(19):2030-6.
- 401
- 402
- 403 19. Sutcliffe KM, Lewton E, Rosenthal MM. Communication failures: an insidious contributor to medical mishaps. *Acad Med* 2004;**79**(2):186-94.
- 404
- 405
- 406 20. Brennan TA, Leape LL, Laird NM, et al. Incidence of adverse events and negligence in hospitalized patients. *N Engl J Med* 1991;**324**:370-6.
- 407
- 408
- 409 21. Wilson RM, Runciman WB, Gibberd RW, et al. The quality in Australian health care study. *Med J Aust* 1995;**163**(9):458-71.
- 410
- 411
- 412 22. Joint Commission on Accreditation of Healthcare Organizations. Using medication reconciliation to prevent errors. *Sentinel Event Alert* 2006;(35):1-4.
- 413
- 414
- 415 23. Fletcher KE, Saint S, Mangrulkar RS. Balancing continuity of care with residents' limited work hours: defining the implications. *Acad Med* 2005;**80**(1):39-43.
- 416
- 417
- 418 24. Landucci D, Gipe BT. The art and science of the handoff: how hospitalists share data. *Hospitalist* 1999;**3**(1):4.
- 419
- 420
- 421 25. Horwitz LI, Meredith T, Schuur JD, et al. Dropping the baton: a qualitative analysis of failures during the transition from emergency department to inpatient care. *Ann Emerg Med* 2009;**53**(6):701-10, e4.
- 422
- 423
- 424
- 425 26. Cullen DJ, Sweitzer BJ, Bates DW, et al. Preventable adverse drug events in hospitalized patients: a comparative study of intensive care and general care units. *Crit Care Med* 1997;**25**(8):1289-97.
- 426
- 427
- 428 27. Voigt LP, Pastores SM, Raoof ND, Thaler HT, Halpern NA: Review of a large clinical series: intrahospital transport of critically ill patients: outcomes, timing, and patterns. *J Intensive Care Med* 2009;**24**(2):108-15.
- 429
- 430
- 431
- 432 28. Watts R, Pierson J, Gardner H. Coordination of the discharge process planning in critical care. *J Clin Nurs* 2005;**21**:39-46.
- 433
- 434

- 1  
2  
3 435 29. Rosenberg AL, Watts C. Patients readmitted to ICUs\* : a systematic review of risk factors and  
4 436 outcomes. *Chest* 2000;**118**(2):492-502.  
5 437  
6  
7 438 30. Li P, Stelfox HT, Ghali WA. A prospective observational study of physician handoff for intensive-  
8 439 care-unit-to-ward patient transfers. *Am J Med* 2011;**124**(9):860-7.  
9 440  
10 441 31. Leeb K, Jokovic A, Sandhu M, et al. CIHI survey: intensive care in Canada. *Healthc Q* 2006;**9**(1):32-  
11 442 3.  
12 443  
13 444 32. Russell S. Reducing readmissions to the intensive care unit. *Heart Lung* 1999;**28**(5):365-72.  
14 445  
15 446 33. College of Intensive Care Medicine. Minimum Standards for Intensive Care Units.  
16 447 [http://www.cicm.org.au/cmsfiles/IC-](http://www.cicm.org.au/cmsfiles/IC-01%20Minimum%20Standards%20For%20Intensive%20Care%20Units%20-%20Current%20September%202011.pdf)  
17 448 [01%20Minimum%20Standards%20For%20Intensive%20Care%20Units%20-](http://www.cicm.org.au/cmsfiles/IC-01%20Minimum%20Standards%20For%20Intensive%20Care%20Units%20-%20Current%20September%202011.pdf)  
18 449 [%20Current%20September%202011.pdf](http://www.cicm.org.au/cmsfiles/IC-01%20Minimum%20Standards%20For%20Intensive%20Care%20Units%20-%20Current%20September%202011.pdf). Accessed February 28, 2012.  
19 450  
20 451 34. Dutton RP, Cooper C, Jones A, et al. Daily multidisciplinary rounds shorten length of stay for  
21 452 trauma patients. *J Trauma* 2003;**55**(5):913-9.  
22 453  
23 454 35. Vazirani S, Hays RD, Shapiro MF, et al. Effect of a multidisciplinary intervention on  
24 455 communication and collaboration among physicians and nurses. *Am J Crit Care* 2005;**14**(1):71-7.  
25 456  
26 457 36. Society for Critical Care Medicine. Practicing CCM.  
27 458 [http://www.sccm.org/AboutSCCM/Public%20Relations/Media\\_Kit/Pages/Practicing\\_CCM.aspx](http://www.sccm.org/AboutSCCM/Public%20Relations/Media_Kit/Pages/Practicing_CCM.aspx).  
28 459 Accessed March 23, 2012.  
29 460  
30 461 37. Ward NS, Read R, Afessa B, et al. Perceived effects of attending physician workload in academic  
31 462 medical intensive care units: a national survey of training program directors. *Crit Care Med*  
32 463 2012;**40**(2):400-5.  
33 464  
34 465 38. Aiken LH, Clarke SP, Sloane DM, et al. Hospital nurse staffing and patient mortality, nurse  
35 466 burnout, and job dissatisfaction. *JAMA* 2002;**288**(16):1987-93.  
36 467  
37 468 39. Goddard AF, Hodgson H, Newbery N. Impact of EWTD on patient:doctor ratios and working  
38 469 practices for junior doctors in England and Wales 2009. *Clin Med* 2010;**10**(4):330-5.  
39 470  
40 471 40. Lin F, Chaboyer W, Wallis M. A literature review of organizational, individual, and teamwork  
41 472 factors contributing to the ICU discharge process. *Aust Crit Care* 2009;**22**:29-43.  
42 473  
43 474 41. Gustad LT, Chaboyer W, Wallis M: ICU patient's transfer anxiety: a prospective cohort study.  
44 475 *Aust Crit Care* 2008;**21**(4):181-9.  
45 476  
46 477 42. Mitchell ML, Courtney M: Reducing family members' anxiety and uncertainty in illness around  
47 478 transfer from intensive care: an intervention study. *Intensive Crit Care Nurs* 2004;**20**(4):223-31.  
48 479  
49 480 43. Forseberg A, Lindgren E, Engström Å: Being transferred from an intensive care unit to a ward:  
50 481 searching for the known in the unknown. *Int J Nurs Pract* 2011;**17**:110-6.  
51 482  
52  
53  
54  
55  
56  
57  
58  
59  
60

- 1  
2  
3 483 44. Strahan EH, Brown RJ: A qualitative study of the experiences of patients following transfer from  
4 484 intensive care. *Intensive Crit Care Nurs* 2005;**21**(3):160-71.  
5 485  
6  
7 486 45. Kripalani S, Jackson AT, Schnipper JL, et al. Promoting effective transitions of care at hospital  
8 487 discharge: a review of key issues for hospitalists. *J Hosp Med* 2007;**2**(5):314-23.  
9 488  
10 489 46. Heidegger C, Treggiari M, Romand J, et al. A nationwide survey of intensive care discharge  
11 490 practice. *Intensive Care Med* 2005;**31**:1676-82.  
12 491  
13 492 47. Kripalani S, LeFevre F, Phillips C, et al. Deficits in Communication and Information Transfer  
14 493 Between Hospital-Based and Primary Care Physicians. *JAMA* 2006;**297**(8):831-41.  
15 494  
16 495 48. Watts R, Pierson J, Gardner H. How do critical care nurses define the discharge process.  
17 496 *Intensive Crit Care Nurs* 2004;**21**:39-46.  
18 497  
19 498 49. Levin P, Worner T, Sviridov S, et al. Intensive care outflow limitation -- frequency, etiology, and  
20 499 impact. *J Crit Care* 2003;**18**(4):206-11.  
21 500  
22 501 50. Wachter RM. Making healthcare safer: a critical analysis of patient safety practices. In: Evidence  
23 502 Report No 43. Edited by Agency for Healthcare Quality Research, AHRQ publication 01-E058  
24 503 edn: Rockville, Md; 2001.  
25 504  
26 505 51. The Joint Commission of Accreditation of Healthcare Organizations. Critical Access Hospital:  
27 506 2012 National Patient Safety Goals.  
28 507 [http://www.jointcommission.org/assets/1/6/NPSG\\_Chapter\\_Jan2012\\_CAH.pdf](http://www.jointcommission.org/assets/1/6/NPSG_Chapter_Jan2012_CAH.pdf). Accessed March  
29 508 11, 2012.  
30 509  
31 510 52. The National Quality Forum. Safe Practices for Better Healthcare: A Consensus Report.  
32 511 <http://www.ahrq.gov/qual/nqfpract.pdf>. Accessed March 12, 2012.  
33 512  
34 513 53. Berwick DM, Calkins DR, McCannon CJ, et al. The 100,000 lives campaign: setting a goal and a  
35 514 deadline for improving health care quality. *JAMA* 2006;**295**(3):324-7.  
36 515  
37 516 54. Boutilier S. Leaving critical care: facilitating a smooth transition. *Dimens Crit Care Nurs*  
38 517 2007;**24**(4):137-42.  
39 518  
40 519 55. Wunsch H, Angus DC, Harrison DA, et al. Variation in critical care services across North America  
41 520 and Western Europe. *Crit Care Med* 2008;**36**(10):2787-93e2781-2789.  
42 521  
43 522 56. Donabedian A. The Definition of Quality and Approaches to Its Assessment. Ann Arbor, Michigan:  
44 523 Health Administration Press 1980.  
45 524  
46 525 57. Donabedian A. Evaluating the quality of medical care. *Milbank Q* 2005;**83**(4):691-729.  
47 526  
48 527 58. Stelfox HT, Bobranska-Artiuch B, Nathens A, et al. Quality indicators for evaluating trauma care:  
49 528 a scoping review. *Arch Surg* 2010;**145**(3):286-95.  
50 529  
51  
52  
53  
54  
55  
56  
57  
58  
59  
60



- 1  
2  
3 530 59. Stelfox HT, Bobranska-Artiuch B, Nathens A, et al. A systematic review of quality indicators for  
4 531 evaluating pediatric trauma care. *Criti Care Med* 2010;**38**(4):1187-96.  
5 532  
6  
7 533 60. Stelfox HT, Nathens AB, Straus SE, et al. Assessing care of patients with major traumatic injuries  
8 534 (Funding Reference #200803PH E-188220-PH M-CBBA-587 44). University of Calgary: Canadian  
9 535 Institutes of Health Research; 2008-10-01 to 2011-09-30.  
10 536  
11 537 61. Stelfox HT, Straus SE, Flemons WW, et al. Quality indicators in trauma care (Funding Reference  
12 538 #KRS-91770). University of Calgary: Canadian Institutes of Health Research; 2008-10-01 to 2009-  
13 539 09-30.  
14 540  
15 541 62. Arksey H, O'Malley L. Scoping studies: towards a methodological framework. *Int J Soc Res*  
16 542 *Methodol* 2005;**8**:19-32.  
17 543  
18 544 63. Levac D, Colquhoun H, O'Brien KK. Scoping studies: advancing the methodology. *Implement Sci*  
19 545 2010;**5**:69.  
20 546  
21 547 64. Agency for Healthcare Research and Quality. AHRQ tools and resources for better health care.  
22 548 *Research in Action, Issue 10* [<http://www.ahrq.gov/qual/tools/toolsria.htm#assessment>].  
23 549 Accessed March 7, 2012.  
24 550  
25 551 65. EndNote X5. In. New York, NY: Thomson Reuter 2012.  
26 552  
27 553 66. Landis JR, Koch GG. The measurement of observer agreement for categorical data. *Biometrics*  
28 554 1977;**33**(1):159-74.  
29 555  
30 556 67. Caldwell K, Henshaw L, Taylor G. Developing a framework for critiquing health research: An early  
31 557 evaluation. *Nurs Educ Today* 2011;**31**(8):e1-7.  
32 558  
33 559 68. McGlynn EA. Selecting common measures of quality and system performance. *Med Care*  
34 560 2003;41(Suppl 1):I39-47.  
35 561  
36 562 69. Fan E, Laupacis A, Pronovost PJ, et al. How to use an article about quality improvement. *JAMA*  
37 563 2010;**304**(20):2279-87.  
38 564  
39 565 70. Strauss A, Corbin J. Basics of Qualitative Research: Techniques and Procedures for Developing  
40 566 Grounded Theory, 2nd edn. Thousand Oaks, CA: Sage Publication 1998.  
41 567  
42 568 71. Hoyt DB, Hollingsworth-Fridlund P, Fortlage D, et al. An evaluation of provider-related and  
43 569 disease-related morbidity in a level I university trauma service: directions for quality  
44 570 improvement. *J Trauma* 1992;**33**(4):586-601.  
45 571  
46 572 72. Davis JW, Hoyt DB, McArdle MS, et al. The significance of critical care errors in causing  
47 573 preventable death in trauma patients in a trauma system. *J Trauma* 1991;**31**(6):813-8;  
48 574 discussion 818-9.  
49 575  
50 576  
51  
52  
53  
54  
55  
56  
57  
58  
59  
60

1  
2  
3 577 **List of Abbreviations**  
4

5 578 Intensive Care Unit, ICU  
6

7  
8 579 Institute of Medicine, IOM  
9

10 580  
11

12  
13 581 **Authors' Contributions**  
14

15 582 Study concept: Stelfox, Perrier, Straus, Ghali, Zygun, Boiteau, Zuege  
16

17 583 Study design: Stelfox, Perrier, Straus, Ghali, Zygun, Boiteau, Zuege  
18

19  
20 584 Obtained funding: Stelfox, Perrier, Straus, Ghali, Zygun, Boiteau, Zuege  
21

22 585 Drafted protocol: Stelfox  
23

24 586 Edited protocol: Stelfox, Perrier, Straus, Ghali, Zygun, Boiteau, Zuege  
25

26  
27 587 All authors read and approved the final protocol.  
28

29 588  
30

31  
32 589 **Competing Interests**  
33

34 590 The authors declare they have no competing interests.  
35

36 591  
37

38  
39 592 **Acknowledgements**  
40

41 593 The project is supported by a Synthesis Grant (KRS124604) from the Canadian Institutes of  
42

43 594 Health Research. Dr. Stelfox is supported by a New Investigator Award from the Canadian  
44

45 595 Institutes of Health Research and a Population Health Investigator Award from Alberta  
46

47 596 Innovates Health Solutions. Dr Straus is funded by a Tier 1 Canada Research Chair. Dr Ghali is  
48

49 597 funded by a Senior Health Scholar Award from Alberta Innovates Health Solutions. Dr. Zygun is  
50

51 598 supported by a Clinical Investigator Award from Alberta Innovates. Funding sources had no role  
52  
53  
54  
55  
56  
57  
58  
59  
60

1  
2  
3 599 in the design of the protocol and we are unaware of any conflicts of interest. We thank Stephanie  
4  
5  
6 600 Todd and Jamie Boyd for helping format our manuscript.  
7

8 601  
9  
10  
11  
12  
13  
14  
15  
16  
17  
18  
19  
20  
21  
22  
23  
24  
25  
26  
27  
28  
29  
30  
31  
32  
33  
34  
35  
36  
37  
38  
39  
40  
41  
42  
43  
44  
45  
46  
47  
48  
49  
50  
51  
52  
53  
54  
55  
56  
57  
58  
59  
60

For peer review only

602 **Table 1. Conceptual model of ICU discharge\***

| <b>IOM Aims</b>         | <b>Structure (Discharge Tool)</b> | <b>Process</b>        | <b>Outcome</b>         |
|-------------------------|-----------------------------------|-----------------------|------------------------|
| <b>Safe</b>             | Risk stratification               | Patient to right ward | ↓ ICU readmission      |
| <b>Effective</b>        | Medication reconciliation         | Right medications     | ↓ adverse event        |
| <b>Efficient</b>        | Information for providers         | Providers informed    | ↓ duplication of tests |
| <b>Timely</b>           | Risk stratification               | Discharged when ready | ↓ length of stay       |
| <b>Patient-Centered</b> | Information for patients          | Patients engaged      | ↑ Patient satisfaction |
| <b>Equitable</b>        | Checklist                         | Equal access          | ↓ inequalities         |

603 \*Table populated with sample tool components and consequent processes and outcomes

604

For peer review only

1  
2  
3 605 **Figure legends**  
4

5 606 Figure 1. Conceptual evidence-based ICU discharge planning tool  
6  
7

8 607  
9

10 608 **Additional Files**  
11

12 609 File name: Additional File 1  
13

14 610 File format: PDF  
15

16 611 Title of data: Draft Search Strategy for Medline  
17

18 612 Description of data: literature search strategy  
19  
20

21 613  
22  
23  
24  
25  
26  
27  
28  
29  
30  
31  
32  
33  
34  
35  
36  
37  
38  
39  
40  
41  
42  
43  
44  
45  
46  
47  
48  
49  
50  
51  
52  
53  
54  
55  
56  
57  
58  
59  
60

1  
2  
3  
4  
5  
6  
7  
8  
9  
10  
11  
12  
13  
14  
15  
16  
17  
18  
19  
20  
21  
22  
23  
24  
25  
26  
27  
28  
29  
30  
31  
32  
33  
34  
35  
36  
37  
38  
39  
40  
41  
42  
43  
44  
45  
46  
47  
48  
49  
50  
51  
52  
53  
54  
55  
56  
57  
58  
59  
60

Figure 1. Conceptual evidence-based ICU discharge planning tool

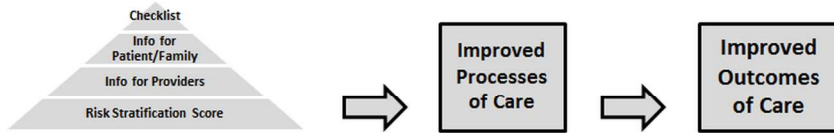

283x90mm (300 x 300 DPI)

peer review only

## Additional File 1. Draft Search Strategy for Medline:

- 
- 1 (critical adj care).tw.
  - 2 (critical\$ adj ill\$).tw.
  - 3 (intensive adj care).mp.
  - 4 ICU?.tw.
  - 5 (cardiovascular adj unit?).tw.
  - 6 (coronary adj care).tw.
  - 7 CCU?.tw.
  - 8 (step-down adj unit?).tw.
  - 9 (burn adj unit?).tw.
  - 10 "high dependency unit?".tw.
  - 11 (neurosurgical adj unit?).tw.
  - 12 (observation adj unit?).tw.
  - 13 exp Intensive Care Units/  
14 exp Critical Care/  
15 Critical Illness/  
16 or/1-15
  - 17 (discharg\$ adj1 plan\$).tw.
  - 18 (discharg\$ adj1 process\$).tw.
  - 19 (discharg\$ adj1 protocol?).tw.
  - 20 (discharg\$ adj1 method\$).tw.
  - 21 (discharg\$ adj1 transition\$).tw.
  - 22 "discharg\$ of patient?".tw.
  - 23 (patient\$ adj1 transition\$).tw.
  - 24 (patient\$ adj1 discharg\$).tw.
  - 25 (patient\$ adj1 transfer\$).tw.
  - 26 (transfer\$ adj1 process\$).tw.
  - 27 (transfer\$ adj1 plan\$).tw.
  - 28 (transfer\$ adj3 ward\$).tw.
  - 29 "transfer\$ of patient?".tw.
  - 30 Patient Discharge/  
31 Patient Transfer/  
32 or/17-31  
33 16 and 32
  - 34 Animals/ not (Animals/ and Humans)  
35 33 not 34
